# Supplementary material
Source: publisher site journal article supplement (https://www.dovepress.com/article/481066)
Supplement: Supplementary file 1 [file get_supplementary_file.php]

**Interrelationships between inflammatory score, delayed cerebral ischemia and unfavorable outcome in patients with aSAH: A four-way decomposition**

**Supplementary Materials**

**1. Supplementary Methods**

**Appendix E1.** Inclusion and exclusion criteria for patients with aSAH

**Appendix E2.** Patient management

**Appendix E3.** Biomarkers selection and inflammatory score construction

**Appendix E4.** DCI definition

**Appendix E5.** Four-way decomposition analysis

**2. Supplementary Tables**

**Table S1.** 22 inflammatory markers used for developing a biomarker risk score

**Table S2.** The parameters of four machine learning classifiers

**Table S3.** Comparisons of baseline characteristics and outcomes between the low and high inflammatory score groups in the primary cohort

**Table S4.** Comparisons of baseline characteristics and outcomes between the low and high inflammatory score groups in the PSM cohort

**Table S5.** Comparisons of baseline characteristics and outcomes between the low and high inflammatory score groups in the IPTW cohort

**Table S6.** Multivariable logistic regression models evaluating the association of inflammatory score with DCI in aSAH patients

**Table S7.** Multivariable logistic regression models evaluating the association of inflammatory score with poor outcome in aSAH patients

**Table S8.** Four-way decomposition assessing the effect of high inflammatory score on poor functional outcome due to mediation and interaction with DCI

**Table S9.** Incremental predictive value of inflammatory score for poor functional outcome in patients with aSAH

**3. Supplementary Figures**

**Figure S1.** Flow diagram of the patient enrollment in this study

**Figure S2.** The day of DCI onset after ictus in aSAH patients

**Figure S3.** A correlation matrix of 22 inflammatory markers

**Figure S4.** Feature selection using the least absolute shrinkage and selection operator (LASSO) regression model

**Figure S5.** The standard mean differences of baseline characteristics before matching and after matching

**Figure S6.** Boxplot of inflammatory score between aSAH patients with and without DCI, and poor outcome

**Figure S7.** Calibration curves analysis of the model with or without inflammatory score

**Figure S8.** Decision curve analysis of the model with or without inflammatory score

**Figure S9.** A nomogram based on inflammatory score for predicting poor outcome in aSAH patients

**Figure S10.** A web-based interactive calculator interface based on a nomogram for predicting the risk of poor outcome in aSAH patients (https://min115. shinyapps.io/dynnomapp/)

**Appendix E1**

**Inclusion and exclusion criteria for patients with aSAH**

Inclusion criteria were listed as follows: 1) adult patients (age >18 years); 2) time interval of symptom onset to hospital admission < 72 hours; 3) rupture of the aneurysm as the cause of SAH confirmed by three-dimensional computed tomographic angiography (CTA), magnetic resonance angiography (MRA), or digital subtraction angiography (DSA); and 4) patients who underwent specialized endovascular coil embolization. Exclusion criteria were listed as follows: 1) patients those with additional aneurysms (e.g., blood bubble, dissection, fusiform, infectious, cerebrovascular or Moyamoya malformation); 2) patients with preoperative unexpected events that could affect the outcome; 3) functional or neurological deficit of the extremities due to any previous disease; 4) history of tumor or neurological impairment, inflammatory diseases, autoimmune diseases; 5) missing critical information (e.g., imaging data, clinical data and biochemical parameters).

**Appendix E2**

**Patient management**

All patients were treated homogeneously according to the (inter)national guidelines.1,2 Specifically, after presentation at the emergency department, patients were either admitted to the brain care unit or the intensive care unit. Ruptured aneurysms were treated endovascular (preferably) or surgically as early as feasible, preferably within 24 hours after ictus. Patients received oral nimodipine, 60 mg, six times daily for 21 days. If patients had raised intracranial pressure or (suspected) hydrocephalus, an external ventricular drain, or an external lumbar drain, was placed. Patients suspected of DCI were treated with noradrenalin-induced normovolemic hypertension induction. Moreover, anti-diabetic, anti-hypertensive, lipid-lowering and antiplatelet medications were taken based on the past medical history and stents.

**Appendix E3**

**Biomarkers selection and inflammatory score construction**

To select parsimonious sets of predictors, we devised a procedure for reducing dimensions and selecting robust inflammatory biomarkers by the following steps, respectively: 1) all biomarkers were standardized to Z-scores; 2) pearson’s correlation analysis was applied to filter out co-linear features with a threshold value of pearson’s correlation coefficient (PCC) > 0.90; 3) receiver operating characteristic (ROC) curve and Kruskal-Wallis test were performed to choose candidate features; 4) least absolute shrinkage and selection operator (LASSO) regression was adopted to select the discriminant features. Thereafter, the selected features were entered into the following machine learning (ML) classifiers to construct radiomics signatures. These included logistic regression (LR), support vector machine (SVM), Gaussian naïve Bayes (NB), and linear discriminant analysis (LDA). Logistic regression (LR) is a commonly used binary linear classifier, which uses the sigmoid function for non-linear transformation and the log maximum likelihood estimation function for learning the posterior probability of a single sample.3 LR was included for its proficiency in providing probabilistic outputs and for ease of interpretation in a clinical context. The support vector machine (SVM) algorithm can be used for linear or non-linear classification, which aims to find the optimal segmentation hyperplane to make the points closer to the hyperplane have a larger distance.4 The effectiveness in high-dimensional spaces made it an ideal choice for handling the complex feature sets typical of clinical data. The naive Bayes (NB) algorithm is based on applying Bayes’ theorem with the “naive” assumption of conditional independence between every pair of features.5 It’s particularly effective for categorical data and is commonly used for classification tasks. The linear discriminant analysis (LDA) algorithm projects the data on the low dimension, and its purpose is to select the projection direction with the best classification performance.6 LDA was chosen for its strength in dimensionality reduction and classification tasks, particularly in datasets where linear combinations of features are meaningful. Each classifier was chosen for its unique approach to learning and pattern recognition, ensuring that the model captured various aspects of the data. More importantly, these are commonly used classifiers in previous ML related studies. The inclusion of different ML classifiers allows us to compare and construct the optimal prediction model for our specific application. The accuracy score, precision score, recall score, F1 score, and area under the receiver operating characteristic curve (AUC) were used to evaluate the performance of the ML model.7 The SVM model demonstrated the best performance with the highest AUC. Therefore, we chose the SVM algorithm to develop the model and calculate the inflammatory score for each observation.

**Appendix E4**

**DCI definition**

DCI status was ascertained using an established definition.8 DCI was recorded as a dichotomous value (present or absent) and was defined as“the occurrence of focal neurological impairment or a decrease of ≥ 2 points on the GCS lasting > 2 hours, which is not immediately apparent after aneurysm occlusion and cannot be attributed to other causes” and/or “the presence of cerebral infarction on CT or MR scan, which was not present after early aneurysm occlusion and which cannot be attributed to other causes such as surgical interventions”. The adjudication of DCI (based on the above definition) was performed by consensus of at least two neurointensivists.

**Appendix E5**

**Four-way decomposition analysis**

Recent work has shown how a total effect of an exposure on an outcome, in the context of a mediator with which the exposure might interact, could be decomposed into four components: that due to just mediation, that due to just interaction, that due to both mediation and interaction, and that due to neither mediation nor interaction.9,10 This approach allowed us to decompose the total effect of inflammatory score on the risk of poor functional outcome into four distinct components: 1) Controlled direct effect: representing the effect solely attributable to high inflammatory score, independent of any interaction or mediation effect with DCI; (2) Reference interaction: arising from the interaction between inflammatory score and DCI; (3) Mediated interaction: arising from both interaction and mediation effect with DCI; (4) Pure indirect effect: representing the effect of inflammatory score that is solely mediated through the occurrence of DCI. The total interaction effect is the sum of the reference interaction and mediated interaction. The total mediation effect is the sum of mediated interaction and pure indirect effect. By decomposing the total effect into these four components, we were able to assess the specific contributions of inflammatory score, DCI, their interaction and mediation effects to the risk of poor outcome.

**Reference**

1. Hoh BL, Ko NU, Amin-Hanjani S, et al. 2023 Guideline for the Management of Patients With Aneurysmal Subarachnoid Hemorrhage: A Guideline From the American Heart Association/American Stroke Association. *Stroke*. 2023;54(7):e314-e70. doi: 10.1161/str.0000000000000436.

2. Fraser JF, Heit JJ, Mascitelli JR, et al. Decoding the data: a comment on the American Heart Association/American Stroke Association (AHA/ASA) 2023 Guideline for the Management of patients with Aneurysmal Subarachnoid Hemorrhage. *J Neurointerv Surg*. 2023;15(9):835-7. doi: 10.1136/jnis-2023-020675.

3. LaValley MP. Logistic regression. *Circulation*. 2008;117(18):2395-9. doi: 10.1161/circulationaha.106.682658.

4. Luts J, Ojeda F, Van de Plas R, et al. A tutorial on support vector machine-based methods for classification problems in chemometrics. *Anal Chim Acta*. 2010;665(2):129-45. doi: 10.1016/j.aca.2010.03.030.

5. Ahmed MS, Shahjaman M, Rana MM, et al. Robustification of Naïve Bayes Classifier and Its Application for Microarray Gene Expression Data Analysis. *Biomed Res Int*. 2017;2017:3020627. doi: 10.1155/2017/3020627.

6. Gardner-Lubbe S. Linear discriminant analysis for multiple functional data analysis. *J Appl Stat*. 2021;48(11):1917-33. doi: 10.1080/02664763.2020.1780569.

7. Yang F, Wang X, Ma H, et al. Transformers-sklearn: a toolkit for medical language understanding with transformer-based models. *BMC Med Inform Decis Mak*. 2021;21(Suppl 2):90. doi: 10.1186/s12911-021-01459-0.

8. Vergouwen MD, Vermeulen M, van Gijn J, et al. Definition of delayed cerebral ischemia after aneurysmal subarachnoid hemorrhage as an outcome event in clinical trials and observational studies: proposal of a multidisciplinary research group. *Stroke*. 2010;41(10):2391-5. doi: 10.1161/strokeaha.110.589275.

9. VanderWeele TJ. A unification of mediation and interaction: a 4-way decomposition. *Epidemiology*. 2014;25(5):749-61. doi: 10.1097/ede.0000000000000121.

10. VanderWeele TJ, Shrier I. Sufficient Cause Representation of the Four-way Decomposition for Mediation and Interaction. *Epidemiology*. 2016;27(5):e32-3. doi: 10.1097/ede.0000000000000521.

**Table S1.** 22 inflammatory markers used for developing a biomarker risk score

| Domain | Markers | Abbreviations | Definition |
| --- | --- | --- | --- |
| Blood cell  counts1,2 | White blood cell count | WBC | - |
| Neutrophil count | N | - |
| Lymphocyte count | L | - |
| Monocyte count | M | - |
| Platelet count | Plt | - |
| Albumin | Alb | - |
| Hemoglobin | Hb | - |
| Red blood cell distribution width | RDW | - |
| Mean platelet volume | MPV | - |
| Direct markers2 | C-reactive protein | CRP | - |
| Lactate dehydrogenase | LDH | - |
| Derived parameters2,4-7 | Neutrophil-to-lymphocyte ratio | NLR | neutrophil count/lymphocyte count |
| Derived neutrophil-to-lymphocyte ratio | dNLR | (WBC count – neutrophil count)/lymphocyte count |
| Platelet-to-lymphocyte ratio | PLR | platelet count/lymphocyte count |
| Monocyte-to-lymphocyte ratio | MLR | monocyte count/lymphocyte count |
| Prognostic nutritional index | PNI | albumin count [g/L] + lymphocyte count × 5 |
| Systemic inflammatory response index | SIRI | neutrophil count × monocyte count/lymphocyte count |
| Systemic immune-inflammation index | SII | neutrophil count × platelet count/lymphocyte count |
| Pan-immune-inflammation value | PIV | (neutrophil count × platelet count × monocyte count)/lymphocyte count |
| Mean platelet volume to platelet ratio | MPR | mean platelet volume/platelet ratio |
| Hemoglobin-to-red blood cell distribution width ratio | HRR | Hemoglobin/red blood cell distribution width ratio |
| C-reactive protein to albumin ratio | CAR | C-reactive protein/albumin ratio |

**Reference**

1. Qiang YX, Deng YT, Zhang YR, et al. Associations of blood cell indices and anemia with risk of incident dementia: A prospective cohort study of 313,448 participants. *Alzheimers Dement*. 2023;19(9):3965-76. doi: 10.1002/alz.13088.

2. Feng J, Zhao X, Huang B, et al. Incorporating inflammatory biomarkers into a prognostic risk score in patients with non-ischemic heart failure: a machine learning approach. *Front Immunol*. 2023;14:1228018. doi: 10.3389/fimmu.2023.1228018.

3. Chu H, Huang C, Zhou Z, et al. Inflammatory score predicts early hematoma expansion and poor outcomes in patients with intracerebral hemorrhage. *Int J Surg*. 2023;109(3):266-76. doi: 10.1097/js9.0000000000000191.

4. Guven DC, Sahin TK, Erul E, et al. The Association between the Pan-Immune-Inflammation Value and Cancer Prognosis: A Systematic Review and Meta-Analysis. *Cancers (Basel)*. 2022;14(11). doi: 10.3390/cancers14112675.

5. Zhang P, Li Y, Zhang H, et al. Prognostic value of the systemic inflammation response index in patients with aneurismal subarachnoid hemorrhage and a Nomogram model construction. *Br J Neurosurg*. 2023;37(6):1560-6. doi: 10.1080/02688697.2020.1831438.

6. Ösken A, Hacı R, Dinç Asarcıklı L, et al. Mean platelet volume/platelet count ratio as a predictor of stent thrombosis in patients with ST-segment-elevation myocardial infarction. *Ir J Med Sci*. 2021;190(3):1095-102. doi: 10.1007/s11845-021-02626-y.

7. Chi G, Lee JJ, Montazerin SM, et al. Prognostic value of hemoglobin-to-red cell distribution width ratio in cancer: a systematic review and meta-analysis. *Biomark Med*. 2022;16(6):473-82. doi: 10.2217/bmm-2021-0577.

**Table S2.** The parameters of four machine learning classifiers

| Characteristics | logistic regression (LR) | support vector machine (SVM) | Gaussian naïve Bayes (NB) | linear discriminant analysis (LDA) |
| --- | --- | --- | --- | --- |
| Cutoff | 0.240 | 0.046 | 0.066 | 0.231 |
| AUC | 0.708 | 0.747 | 0.667 | 0.701 |
| AUC.SE | 0.031 | 0.032 | 0.031 | 0.031 |
| AUC.low | 0.647 | 0.686 | 0.605 | 0.639 |
| AUC.up | 0.769 | 0.809 | 0.729 | 0.762 |
| *P* value | **< 0.001** | **< 0.001** | **< 0.001** | **< 0.001** |
| ACC | 0.668 | 0.745 | 0.590 | 0.652 |
| ACC.low | 0.667 | 0.744 | 0.588 | 0.651 |
| ACC.up | 0.670 | 0.746 | 0.591 | 0.653 |
| SEN | 0.688 | 0.677 | 0.771 | 0.708 |
| SEN.low | 0.595 | 0.584 | 0.687 | 0.617 |
| SEN.up | 0.780 | 0.771 | 0.855 | 0.799 |
| SPE | 0.662 | 0.768 | 0.526 | 0.632 |
| SPE.low | 0.606 | 0.718 | 0.466 | 0.575 |
| SPE.up | 0.718 | 0.819 | 0.585 | 0.690 |
| PLR | 2.033 | 2.923 | 1.625 | 1.927 |
| PLR.low | 1.641 | 2.261 | 1.377 | 1.574 |
| PLR.up | 2.518 | 3.779 | 1.919 | 2.358 |
| NLR | 0.472 | 0.420 | 0.436 | 0.461 |
| NLR.low | 0.347 | 0.312 | 0.297 | 0.333 |
| NLR.up | 0.643 | 0.566 | 0.640 | 0.638 |
| PPV | 0.418 | 0.508 | 0.365 | 0.405 |
| PPV.low | 0.341 | 0.421 | 0.298 | 0.331 |
| PPV.up | 0.495 | 0.594 | 0.431 | 0.479 |
| NPV | 0.857 | 0.871 | 0.867 | 0.860 |
| NPV.low | 0.810 | 0.828 | 0.815 | 0.812 |
| NPV.up | 0.904 | 0.913 | 0.919 | 0.908 |
| PPA | 0.688 | 0.677 | 0.771 | 0.708 |
| PPA.low | 0.595 | 0.584 | 0.687 | 0.617 |
| PPA.up | 0.780 | 0.771 | 0.855 | 0.799 |
| NPA | 0.662 | 0.768 | 0.526 | 0.632 |
| NPA.low | 0.606 | 0.718 | 0.466 | 0.575 |
| NPA.up | 0.718 | 0.819 | 0.585 | 0.690 |
| TPA | 0.668 | 0.745 | 0.590 | 0.652 |
| TPA.low | 0.620 | 0.700 | 0.539 | 0.604 |
| TPA.up | 0.717 | 0.789 | 0.640 | 0.701 |
| KAPPA | 0.289 | 0.402 | 0.218 | 0.274 |
| KAPPA.low | 0.195 | 0.303 | 0.137 | 0.183 |
| KAPPA.up | 0.383 | 0.501 | 0.299 | 0.366 |

**Notes:** As indicated by the bold font, the p value reached statistical significance.

**Abbreviations:** AUC, area under curve; SE, standard error; ACC, accuracy; SEN, sensitivity; SPE, specificity; PLR, positive Ilkellhood ratio; NLR, negative likelihood ratio; PPV, positive predictive value; NPV, negative predictive value; PPA, positive accordance; NPA, negative accordance; TPA, total accordance.

**Table S3.** Comparisons of baseline characteristics and outcomes between the low and high inflammatory score groups in the primary cohort

| Characteristics | Primary cohort | | |
| --- | --- | --- | --- |
| Low inflammatory score | High inflammatory score | *P* value |
| No. of patients | 241 | 127 |  |
| Age | 55.00 [45.00, 66.00] | 57.00 [48.00, 68.00] | **0.044** |
| Age > 65 years | 61 (25.3) | 43 (33.9) | 0.523 |
| Gender |  |  |  |
| Male | 94 (39.0) | 56 (44.1) | 0.345 |
| Female | 147 (61.0) | 71 (55.9) |  |
| Medical history |  |  |  |
| Smoking | 75 (31.1) | 47 (37.0) | 0.254 |
| Alcohol | 82 (34.0) | 52 (40.9) | 0.190 |
| Hypertension | 45 (18.7) | 24 (18.9) | 0.958 |
| Diabetes | 48 (19.9) | 26 (20.5) | 0.899 |
| Heart disease | 9 (3.7) | 8 (6.3) | 0.265 |
| Previous stroke | 21 (8.7) | 12 (9.4) | 0.814 |
| Hyperlipidemia | 12 (5.0) | 13 (10.2) | 0.057 |
| Admission clinical grade |  |  |  |
| GCS score | 14.00 [13.00, 15.00] | 13.00 [11.00, 14.00] | **<0.001** |
| 9-15 point | 216 (89.6) | 84 (66.1) | **<0.001** |
| < 9 point | 25 (10.4) | 43 (33.9) |  |
| WFNS grade | 2.00 [1.00, 3.00] | 3.00 [2.00, 4.00] | **<0.001** |
| I–III | 216 (89.6) | 84 (66.1) | **<0.001** |
| IV–V | 25 (10.4) | 43 (33.9) |  |
| HH grade | 2.00 [1.00, 2.00] | 2.00 [2.00, 3.00] | **<0.001** |
| I–III | 232 (96.3) | 105 (82.7) | **<0.001** |
| IV–V | 9 (3.7) | 22 (17.3) |  |
| mFS grade | 3.00 [2.00, 4.00] | 3.00 [2.00, 4.00] | **0.001** |
| I-II | 169 (70.1) | 65 (51.2) | **<0.001** |
| III-IV | 72 (29.9) | 62 (48.8) |  |
| Acute hydrocephalus |  |  |  |
| No | 223 (92.5) | 108 (85.0) | **0.023** |
| Yes | 18 (7.5) | 19 (15.0) |  |
| Aneurysm characteristics |  |  |  |
| Maximum size (mm) | 5.23 [3.87, 6.80] | 5.49 [4.20, 7.03] | 0.177 |
| < 3 mm | 19 (7.9) | 7 (5.5) | 0.688 |
| 3-10 mm | 206 (85.5) | 112 (88.2) |  |
| > 10 mm | 16 (6.6) | 8 (6.3) |  |
| Neck width (mm) | 3.43 [1.56, 4.40] | 3.57 [1.70, 4.46] | 0.212 |
| ≥ 4 mm | 81 (33.6) | 48 (37.8) | 0.424 |
| AR ratio | 1.82 [1.51, 2.60] | 1.84 [1.53, 2.55] | 0.817 |
| ≤ 2 | 133 (55.2) | 73 (57.5) | 0.673 |
| Location |  |  |  |
| Anterior | 216 (89.6) | 103 (81.1) | **0.022** |
| Posterior | 25 (10.4) | 24 (18.9) |  |
| Shape |  |  |  |
| Regular | 161 (66.8) | 84 (66.1) | 0.898 |
| Irregular | 80 (33.2) | 43 (33.9) |  |
| Wide neck |  |  |  |
| No | 106 (44.0) | 51 (40.2) | 0.481 |
| Yes | 135 (56.0) | 76 (59.8) |  |
| Timing of treatment |  |  |  |
| ≤ 24h | 137 (56.8) | 57 (44.9) | **0.037** |
| 24-72h | 74 (30.7) | 56 (44.1) |  |
| >72h | 30 (12.4) | 14 (11.0) |  |
| Stents assist coiling |  |  |  |
| No | 126 (52.3) | 54 (42.5) | 0.075 |
| Yes | 115 (47.7) | 73 (57.5) |  |
| Occlusion level |  |  |  |
| class I | 209 (86.7) | 107 (84.3) | 0.518 |
| class II-III | 32 (13.3) | 20 (15.7) |  |
| DCI |  |  |  |
| No | 210 (87.1) | 82 (64.6) | **<0.001** |
| Yes | 31 (12.9) | 45 (35.4) |  |
| Poor outcome |  |  |  |
| No | 209 (86.7) | 63 (49.6) | **<0.001** |
| Yes | 32 (13.3) | 64 (50.4) |  |

**Notes:** Data are expressed as n (%), mean ± standard deviation, or median (interquartile range), as appropriate. As indicated by the bold font, the p value reached statistical significance.

**Abbreviations:** GCS, Glasgow Coma Scale; WFNS, World Federation of Neurosurgical Societies; HH, Hunt Hess; mFS, modified Fisher Scale; AR, aneurysm maximum height to neck diameter ratio; DCI, delayed cerebral ischemia.

**Table S4.** Comparisons of baseline characteristics and outcomes between the low and high inflammatory score groups in the PSM cohort

| Characteristics | PSM cohort | | |
| --- | --- | --- | --- |
| Low inflammatory score | High inflammatory score | *P* value |
| No. of patients | 123 | 123 |  |
| Age | 58.00 [48.50, 68.50] | 57.00 [47.50, 68.00] | 0.897 |
| Age > 65 years | 40 (32.5) | 42 (34.1) | 0.689 |
| Gender |  |  |  |
| Male | 55 (44.7) | 56 (45.5) | 0.898 |
| Female | 68 (55.3) | 67 (54.5) |  |
| Medical history |  |  |  |
| Smoking | 44 (35.8) | 45 (36.6) | 0.894 |
| Alcohol | 49 (39.8) | 51 (41.5) | 0.795 |
| Hypertension | 18 (14.6) | 24 (19.5) | 0.309 |
| Diabetes | 24 (19.5) | 23 (18.7) | 0.871 |
| Heart disease | 6 (4.9) | 8 (6.5) | 0.582 |
| Previous stroke | 13 (10.6) | 12 (9.8) | 0.833 |
| Hyperlipidemia | 9 (7.3) | 12 (9.8) | 0.494 |
| Admission clinical grade |  |  |  |
| GCS score | 13.00 [13.00, 14.00] | 13.00 [11.00, 14.00] | 0.196 |
| 9-15 point | 99 (80.5) | 84 (68.3) | **0.028** |
| < 9 point | 24 (19.5) | 39 (31.7) |  |
| WFNS grade | 3.00 [2.00, 3.00] | 3.00 [2.00, 4.00] | 0.093 |
| I–III | 99 (80.5) | 84 (68.3) | **0.028** |
| IV–V | 24 (19.5) | 39 (31.7) |  |
| HH grade | 2.00 [2.00, 3.00] | 2.00 [2.00, 3.00] | 0.149 |
| I–III | 114 (92.7) | 104 (84.6) | **0.045** |
| IV–V | 9 (7.3) | 19 (15.4) |  |
| mFS grade | 3.00 [2.00, 4.00] | 3.00 [2.00, 4.00] | 0.168 |
| I-II | 76 (61.8) | 65 (52.8) | 0.156 |
| III-IV | 47 (38.2) | 58 (47.2) |  |
| Acute hydrocephalus |  |  |  |
| No | 112 (91.1) | 104 (84.6) | 0.119 |
| Yes | 11 (8.9) | 19 (15.4) |  |
| Aneurysm characteristics |  |  |  |
| Maximum size (mm) | 5.26 [3.80, 6.84] | 5.49 [4.24, 7.03] | 0.208 |
| < 3 mm | 10 (8.1) | 4 (3.3) | 0.210 |
| 3-10 mm | 104 (84.6) | 112 (91.1) |  |
| > 10 mm | 9 (7.3) | 7 (5.7) |  |
| Neck width (mm) | 3.66 [1.49, 4.42] | 3.60 [1.73, 4.46] | 0.232 |
| ≥ 4 mm | 42 (34.1) | 47 (38.2) | 0.507 |
| AR ratio | 1.80 [1.50, 2.64] | 1.79 [1.52, 2.54] | 0.954 |
| ≤ 2 | 66 (53.7) | 72 (58.5) | 0.441 |
| Location |  |  |  |
| Anterior | 103 (83.7) | 101 (82.1) | 0.735 |
| Posterior | 20 (16.3) | 22 (17.9) |  |
| Shape |  |  |  |
| Regular | 89 (72.4) | 82 (66.7) | 0.332 |
| Irregular | 34 (27.6) | 41 (33.3) |  |
| Wide neck |  |  |  |
| No | 56 (45.5) | 49 (39.8) | 0.367 |
| Yes | 67 (54.5) | 74 (60.2) |  |
| Timing of treatment |  |  |  |
| ≤ 24h | 64 (52.0) | 56 (45.5) | **0.032** |
| 24-72h | 36 (29.3) | 54 (43.9) |  |
| >72h | 23 (18.7) | 13 (10.6) |  |
| Stents assist coiling |  |  |  |
| No | 60 (48.8) | 53 (43.1) | 0.370 |
| Yes | 63 (51.2) | 70 (56.9) |  |
| Occlusion level |  |  |  |
| class I | 102 (82.9) | 103 (83.7) | 0.864 |
| class II-III | 21 (17.1) | 20 (16.3) |  |
| DCI |  |  |  |
| No | 108 (87.8) | 80 (65.0) | **<0.001** |
| Yes | 15 (12.2) | 43 (35.0) |  |
| Poor outcome |  |  |  |
| No | 103 (83.1) | 62 (50.0) | **<0.001** |
| Yes | 21 (16.9) | 62 (50.0) |  |

**Notes:** Data are expressed as n (%), mean ± standard deviation, or median (interquartile range), as appropriate. As indicated by the bold font, the p value reached statistical significance.

**Abbreviations:** GCS, Glasgow Coma Scale; WFNS, World Federation of Neurosurgical Societies; HH, Hunt Hess; mFS, modified Fisher Scale; AR, aneurysm maximum height to neck diameter ratio; DCI, delayed cerebral ischemia.

**Table S5.** Comparisons of baseline characteristics and outcomes between the low and high inflammatory score groups in the IPTW cohort

| Characteristics | IPTW cohort | | |
| --- | --- | --- | --- |
| Low inflammatory score | High inflammatory score | *P* value |
| No. of patients | 368.3 | 364.7 |  |
| Age | 54.91 (13.71) | 55.04 (11.55) | 0.933 |
| Age > 65 years | 99.1 (26.9) | 97.1 (26.6) | 0.957 |
| Gender |  |  |  |
| Male | 150.0 (40.7) | 156.6 (42.9) | 0.724 |
| Female | 218.3 (59.3) | 208.2 (57.1) |  |
| Medical history |  |  |  |
| Smoking | 124.1 (33.7) | 117.2 (32.1) | 0.791 |
| Alcohol | 136.8 (37.1) | 127.9 (35.1) | 0.730 |
| Hypertension | 67.5 (18.3) | 70.8 (19.4) | 0.826 |
| Diabetes | 66.8 (18.1) | 63.7 (17.5) | 0.881 |
| Heart disease | 13.4 (3.6) | 12.3 (3.4) | 0.883 |
| Previous stroke | 33.1 (9.0) | 37.5 (10.3) | 0.743 |
| Hyperlipidemia | 20.8 (5.6) | 21.1 (5.8) | 0.956 |
| Admission clinical grade |  |  |  |
| GCS score | 13.16 (2.11) | 13.11 (2.37) | 0.840 |
| 9-15 point | 301.2 (81.8) | 297.6 (81.6) | 0.964 |
| < 9 point | 67.0 (18.2) | 67.2 (18.4) |  |
| WFNS grade | 2.43 (1.13) | 2.43 (1.17) | 0.991 |
| I–III | 301.2 (81.8) | 297.6 (81.6) | 0.964 |
| IV–V | 67.0 (18.2) | 67.2 (18.4) |  |
| HH grade | 2.10 (0.93) | 2.10 (1.02) | 0.963 |
| I–III | 343.9 (93.4) | 334.5 (91.7) | 0.580 |
| IV–V | 24.4 (6.6) | 30.2 (8.3) |  |
| mFS grade | 3.03 (1.10) | 3.01 (1.15) | 0.900 |
| I-II | 235.7 (64.0) | 234.9 (64.4) | 0.947 |
| III-IV | 132.5 (36.0) | 129.8 (35.6) |  |
| Acute hydrocephalus |  |  |  |
| No | 335.6 (91.1) | 327.6 (89.8) | 0.714 |
| Yes | 32.7 (8.9) | 37.2 (10.2) |  |
| Aneurysm characteristics |  |  |  |
| Maximum size (mm) | 5.64 (2.40) | 5.74 (2.41) | 0.718 |
| < 3 mm | 31.6 (8.6) | 20.2 (5.5) | 0.683 |
| 3-10 mm | 314.0 (85.3) | 321.9 (88.2) |  |
| > 10 mm | 22.7 (6.2) | 22.7 (6.2) |  |
| Neck width (mm) | 3.14 (1.80) | 3.23 (1.83) | 0.686 |
| ≥ 4 mm | 121.0 (32.9) | 126.4 (34.6) | 0.761 |
| AR ratio | 2.14 (0.86) | 2.07 (0.63) | 0.573 |
| ≤ 2 | 198.6 (53.9) | 202.1 (55.4) | 0.817 |
| Location |  |  |  |
| Anterior | 325.4 (88.3) | 316.0 (86.6) | 0.657 |
| Posterior | 42.9 (11.7) | 48.7 (13.4) |  |
| Shape |  |  |  |
| Regular | 242.2 (65.8) | 236.1 (64.7) | 0.868 |
| Irregular | 126.1 (34.2) | 128.7 (35.3) |  |
| Wide neck |  |  |  |
| No | 167.0 (45.3) | 159.0 (43.6) | 0.785 |
| Yes | 201.3 (54.7) | 205.7 (56.4) |  |
| Timing of treatment |  |  |  |
| ≤ 24h | 188.7 (51.3) | 187.8 (51.5) | 0.997 |
| 24-72h | 137.1 (37.2) | 134.2 (36.8) |  |
| >72h | 42.4 (11.5) | 42.7 (11.7) |  |
| Stents assist coiling |  |  |  |
| No | 176.7 (48.0) | 171.5 (47.0) | 0.881 |
| Yes | 191.5 (52.0) | 193.2 (53.0) |  |
| Occlusion level |  |  |  |
| class I | 317.6 (86.2) | 310.1 (85.0) | 0.778 |
| class II-III | 50.7 (13.8) | 54.7 (15.0) |  |
| DCI |  |  |  |
| No | 321.1 (87.2) | 253.8 (69.6) | **<0.001** |
| Yes | 47.2 (12.8) | 110.9 (30.4) |  |
| Poor outcome |  |  |  |
| No | 307.1 (83.4) | 203.0 (55.7) | **<0.001** |
| Yes | 61.2 (16.6) | 161.7 (44.3) |  |

**Notes:** As indicated by the bold font, the p value reached statistical significance.

**Abbreviations:** GCS, Glasgow Coma Scale; WFNS, World Federation of Neurosurgical Societies; HH, Hunt Hess; mFS, modified Fisher Scale; AR, aneurysm maximum height to neck diameter ratio; DCI, delayed cerebral ischemia.

**Table S6.** Multivariable logistic regression models evaluating the association of inflammatory score with DCI in aSAH patients

| Characteristics | Univariable analysis of DCI | | | Multivariable analysis of DCI | | | Multivariable analysis of DCI | | |
| --- | --- | --- | --- | --- | --- | --- | --- | --- | --- |
| OR | 95% CI | *P* value | OR | 95% CI | *P* value | OR | 95% CI | *P* value |
| Age | 1.13 | 0.65-1.96 | 0.664 |  |  |  |  |  |  |
| Gender | 0.93 | 0.56-1.56 | 0.789 |  |  |  |  |  |  |
| Smoking | 1.23 | 0.73-2.08 | 0.443 |  |  |  |  |  |  |
| Alcohol | 0.89 | 0.52-1.51 | 0.654 |  |  |  |  |  |  |
| Hypertension | 1.47 | 0.80-2.70 | 0.218 |  |  |  |  |  |  |
| Diabetes | 1.57 | 0.87-2.84 | 0.132 |  |  |  |  |  |  |
| Heart disease | 1.19 | 0.38-3.77 | 0.764 |  |  |  |  |  |  |
| Previous stroke | 1.26 | 0.54-2.91 | 0.594 |  |  |  |  |  |  |
| Hyperlipidemia | 1.54 | 0.62-3.84 | 0.350 |  |  |  |  |  |  |
| WFNS grade | 3.10 | 1.74-5.50 | **<0.001** | 1.98 | 1.00-3.93 | **0.050** | 2.38 | 1.20-4.72 | **0.013** |
| Acute hydrocephalus | 2.30 | 1.11-4.77 | **0.025** | 1.30 | 0.55-3.09 | 0.544 | 1.21 | 0.50-2.97 | 0.670 |
| Location | 1.47 | 0.73-2.93 | 0.277 |  |  |  |  |  |  |
| Shape | 1.13 | 0.66-1.91 | 0.663 |  |  |  |  |  |  |
| Size group | 1.30 | 0.50-3.41 | 0.587 |  |  |  |  |  |  |
| Wide neck | 0.79 | 0.47-1.31 | 0.352 |  |  |  |  |  |  |
| Timing of treatment | 0.72 | 0.43-1.20 | 0.204 |  |  |  |  |  |  |
| Stents assist coiling | 0.95 | 0.57-1.57 | 0.831 |  |  |  |  |  |  |
| Occlusion level | 1.51 | 0.77-2.96 | 0.230 |  |  |  |  |  |  |
| Inflammatory score1 | 1.93 | 1.48-2.51 | **<0.001** |  |  |  | 1.84 | 1.41-2.39 | **<0.001** |
| High inflammatory score | 3.72 | 2.20-6.28 | **<0.001** | 3.12 | 1.81-5.39 | **<0.001** |  |  |  |

**Notes:** 1Per unit change in regressor. As indicated by the bold font, the p value reached statistical significance.

**Abbreviations:** aSAH, aneurysmal subarachnoid hemorrhage; WFNS, World Federation of Neurosurgical Societies; DCI, delayed cerebral ischemia; OR, odds ratio; CI, confidence intervals.

**Table S7.** Multivariable logistic regression models evaluating the association of inflammatory score with poor outcome in aSAH patients

| Characteristics | Univariable analysis of outcome | | | Multivariable analysis of outcome | | | Multivariable Analysis of outcome | | |
| --- | --- | --- | --- | --- | --- | --- | --- | --- | --- |
| OR | 95% CI | *P* value | OR | 95% CI | *P* value | OR | 95% CI | *P* value |
| Age | 2.47 | 1.51-4.05 | **<0.001** | 2.94 | 1.60-5.37 | **<0.001** | 2.87 | 1.57-5.23 | **0.001** |
| Gender | 1.28 | 0.79-2.06 | 0.319 |  |  |  |  |  |  |
| Smoking | 1.08 | 0.66-1.76 | 0.767 |  |  |  |  |  |  |
| Alcohol | 1.43 | 0.89-2.31 | 0.137 |  |  |  |  |  |  |
| Hypertension | 2.32 | 1.34-4.03 | **0.003** | 2.72 | 1.38-5.37 | **0.004** | 2.13 | 1.07-4.21 | **0.031** |
| Diabetes | 1.16 | 0.65-2.04 | 0.616 |  |  |  |  |  |  |
| Heart disease | 0.59 | 0.17-2.12 | 0.422 |  |  |  |  |  |  |
| Previous stroke | 2.27 | 1.09-4.74 | **0.028** | 2.38 | 0.96-5.91 | 0.062 | 2.01 | 0.82-4.93 | 0.128 |
| Hyperlipidemia | 1.11 | 0.45-2.75 | 0.822 |  |  |  |  |  |  |
| WFNS grade | 5.29 | 3.03-9.23 | **<0.001** | 2.49 | 1.18-5.24 | **0.016** | 3.33 | 1.60-6.95 | **0.001** |
| Acute hydrocephalus | 3.07 | 1.54-6.14 | **0.001** | 1.40 | 0.53-3.69 | 0.502 | 1.27 | 0.48-3.35 | 0.626 |
| Location | 1.99 | 1.06-3.73 | **0.032** | 1.45 | 0.67-3.13 | 0.341 | 1.51 | 0.69-3.32 | 0.301 |
| Shape | 1.20 | 0.74-1.95 | 0.464 |  |  |  |  |  |  |
| Size group | 0.94 | 0.36-2.44 | 0.900 |  |  |  |  |  |  |
| Wide neck | 1.06 | 0.66-1.69 | 0.818 |  |  |  |  |  |  |
| Timing of treatment | 1.10 | 0.69-1.74 | 0.702 |  |  |  |  |  |  |
| Stents assist coiling | 1.25 | 0.78-2.00 | 0.348 |  |  |  |  |  |  |
| Occlusion level | 0.73 | 0.36-1.48 | 0.383 |  |  |  |  |  |  |
| DCI | 5.88 | 3.42-10.11 | **<0.001** | 4.22 | 2.24-7.92 | **<0.001** | 3.61 | 1.88-6.93 | **<0.001** |
| Inflammatory score1 | 3.50 | 2.19-5.62 | **<0.001** |  |  |  | 2.68 | 1.67-4.28 | **<0.001** |
| High inflammatory score | 6.63 | 3.99-11.04 | **<0.001** | 4.87 | 2.71-8.75 | **<0.001** |  |  |  |

**Notes:** 1Per unit change in regressor. As indicated by the bold font, the p value reached statistical significance.

**Abbreviations:** aSAH, aneurysmal subarachnoid hemorrhage; WFNS, World Federation of Neurosurgical Societies; DCI, delayed cerebral ischemia; OR, odds ratio; CI, confidence intervals.

**Table S8.** Four-way decomposition assessing the effect of high inflammatory score on poor functional outcome due to mediation and interaction with DCI

| Characteristics | Unadjusted model | | | Adjusted modela | | |
| --- | --- | --- | --- | --- | --- | --- |
| Excess relative risk (95% CI) | Proportion attributed (%) | *P* value | Excess relative risk (95% CI) | Proportion attributed (%) | *P* value |
| Controlled direct effect (CDE) | 2.66 (0.61-4.71) | 29.11 | **0.011** | 2.24 (0.29-4.19) | 30.86 | **0.024** |
| Reference interaction (INTref) | 2.24 (-0.09-4.56) | 24.48 | 0.059 | 1.93 (-0.25-4.12) | 26.64 | 0.083 |
| Mediated interaction (INTmed) | 3.93 (-0.38-8.23) | 42.95 | 0.074 | 2.82 (-0.62-6.27) | 38.89 | 0.108 |
| Pure indirect effect (PIE) | 0.31 (-0.08-0.71) | 3.44 | 0.122 | 0.26 (-0.09-0.62) | 3.60 | 0.150 |
| Total excess relative risk (TE) | 9.14 (2.10-16.17) |  | **0.011** | 7.26 (1.21-13.31) |  | **0.019** |

**Notes:** aMultivariable regression model adjusted for the confounders (age, hypertension, previous stroke, WFNS grade, acute hydrocephalus and aneurysm location) which were statistically significant in univariate analysis (p ≤ 0.10). As indicated by the bold font, the p value reached statistical significance.

**Abbreviations:** DCI, delayed cerebral ischemia; CI, confidence intervals.

**Table S9.** Incremental predictive value of inflammatory score for poor functional outcome in patients with aSAH

| Characteristics | ROC | | IDI | | NRI (Categorical) | | NRI (Continuous) | |
| --- | --- | --- | --- | --- | --- | --- | --- | --- |
| AUC (95% CI) | *p*  value | Value (95% CI) | *p*  value | Value (95% CI) | *p*  value | Value (95% CI) | *p*  value |
| Conventional model | 0.772  (0.716-0.829) |  | Refence |  | Refence |  | Refence |  |
| Hybrid model | 0.822  (0.772-0.872) | **0.009** | 0.069  (0.040 - 0.098) | **<0.001** | 0.05338  (-0.065 - 0.172) | 0.379 | 0.870  (0.657 - 1.083) | **<0.001** |

**Notes:** As indicated by the bold font, the p value reached statistical significance.

**Abbreviations:** aSAH, aneurysmal subarachnoid hemorrhage; ROC, receiver operating characteristic; IDI, integrated discrimination improvement; NRI, net reclassification improvement; AUC, area Under curve; CI, confidence intervals

**
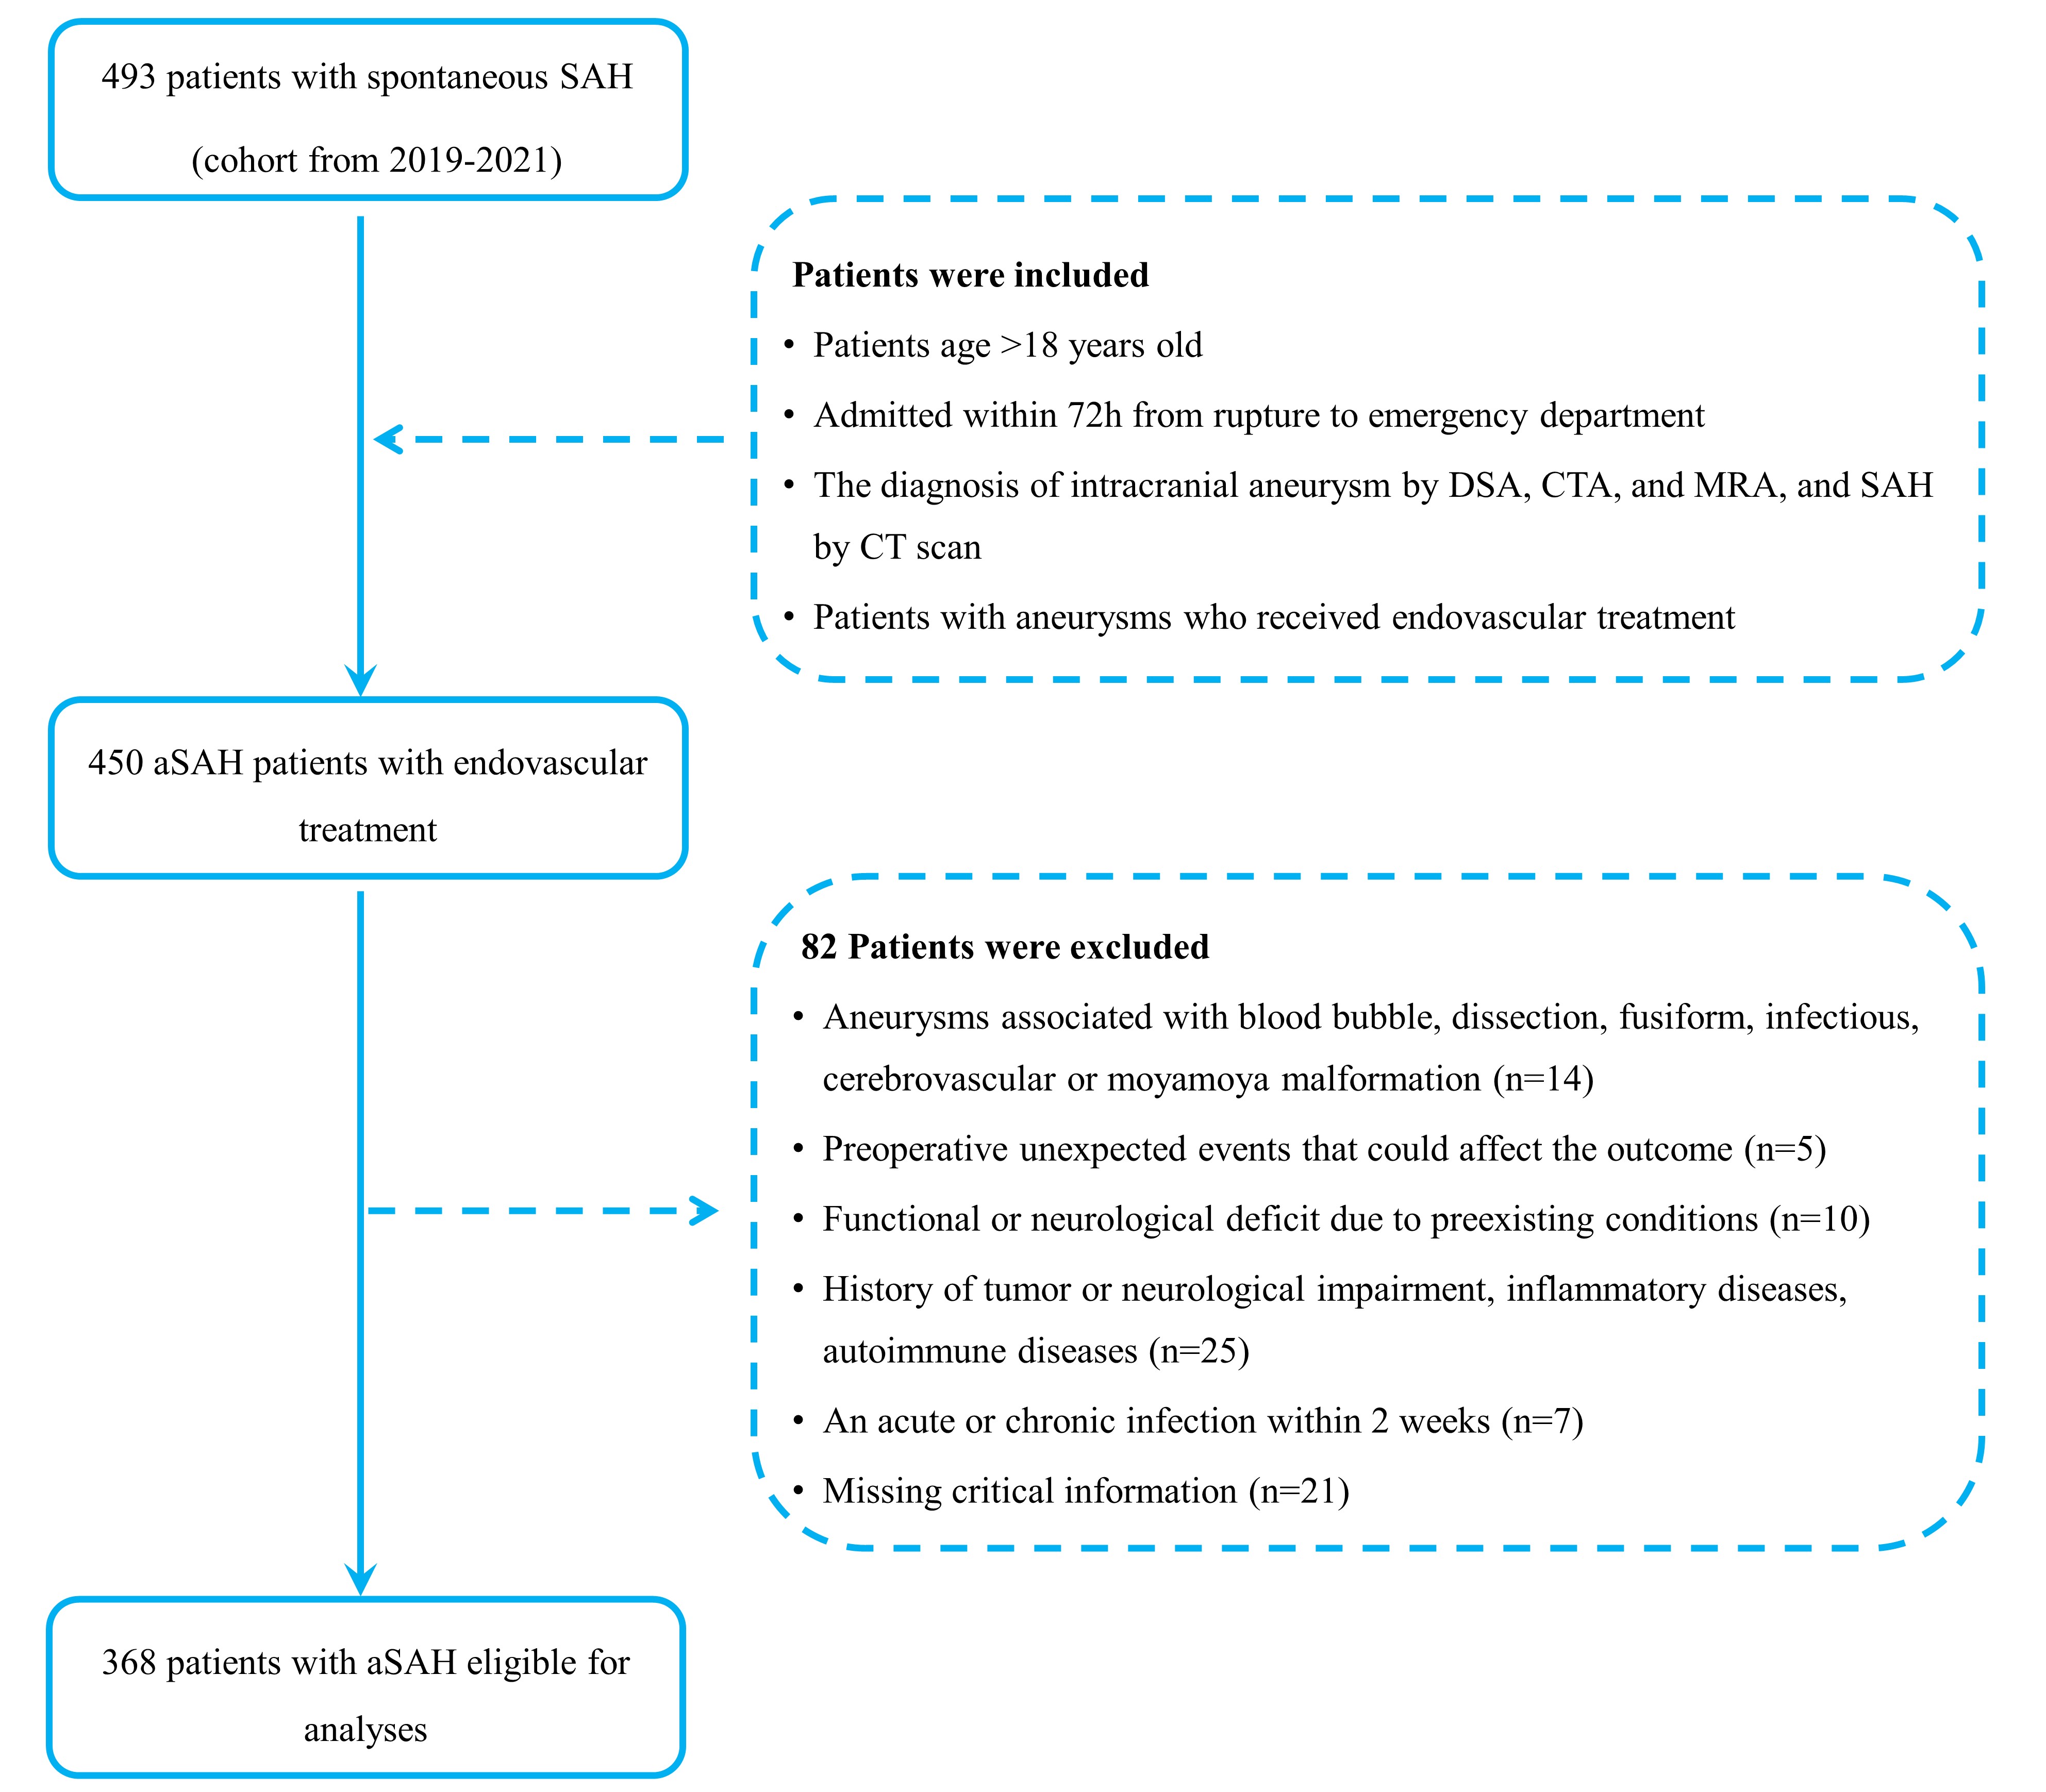
**

**Figure S1.** Flow diagram of the patient enrollment in this study

**Abbreviations:** SAH, subarachnoid hemorrhage; DSA, digital subtraction angiography; CTA, computed tomographic angiography; MRA, magnetic resonance angiography; CT, computed tomography; aSAH, aneurysmal subarachnoid hemorrhage.

**
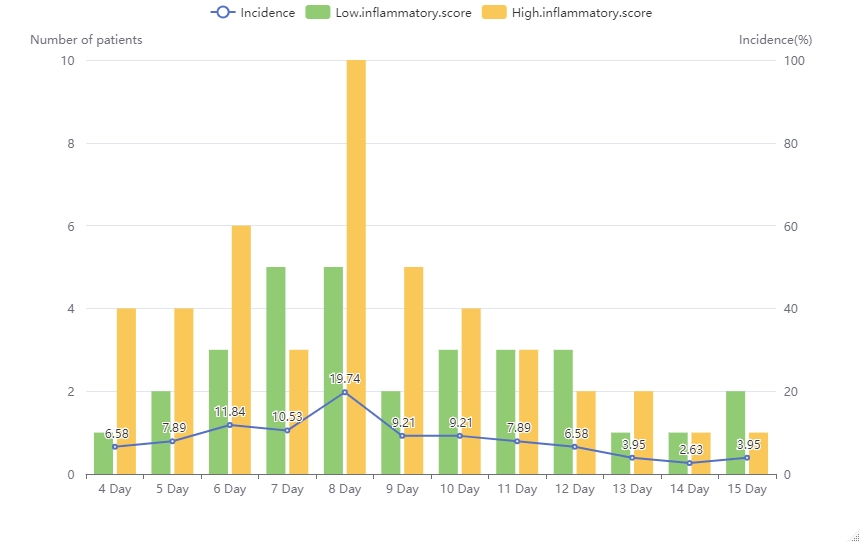
**

**Figure S2.** The day of DCI onset after ictus in aSAH patients

**Abbreviations:** DCI, delayed cerebral ischemia; aSAH, aneurysmal subarachnoid hemorrhage.

**
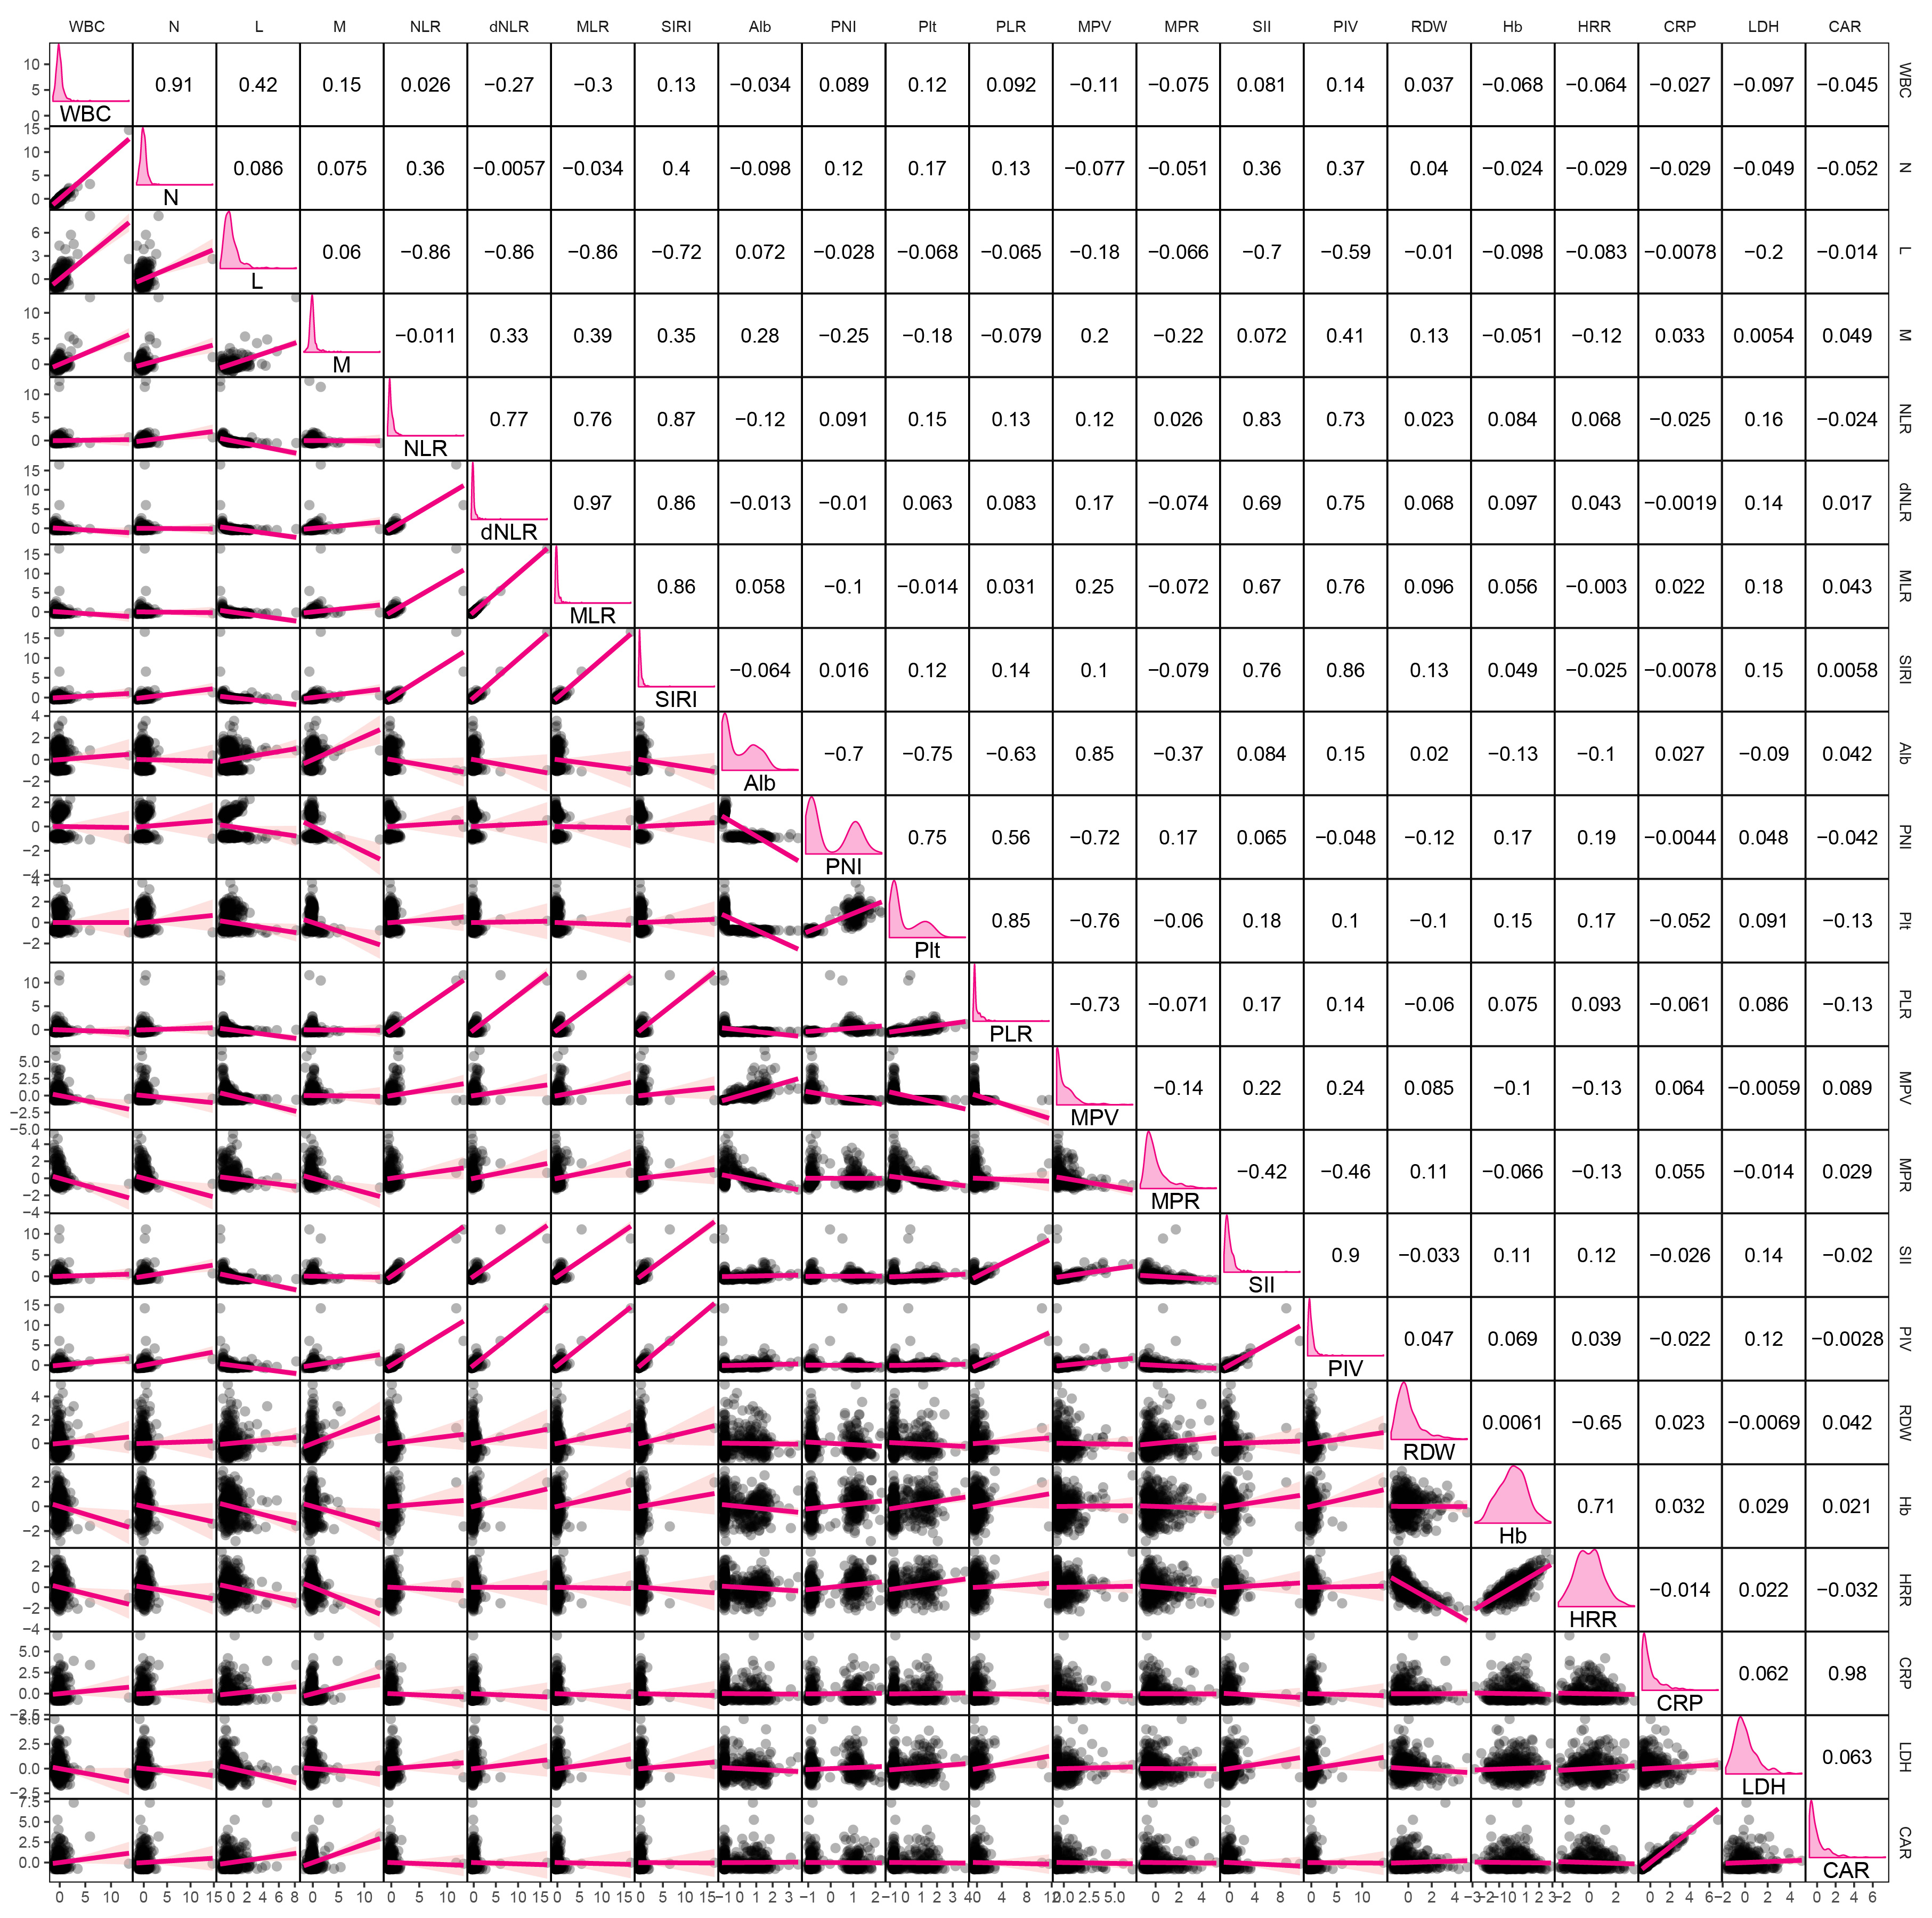
**

**Figure S3.** A correlation matrix of 22 inflammatory markers

**Abbreviations:** WBC, White blood cell count; N, Neutrophil count; L, Lymphocyte count; M, Monocyte count; Plt, Platelet count; Alb, Albumin; Hb, Hemoglobin; RDW, Red blood cell distribution width; MPV, Mean platelet volume; CRP, C-reactive protein; LDH, Lactate dehydrogenase; NLR, Neutrophil-to-lymphocyte ratio; dNLR, Derived neutrophil-to-lymphocyte ratio; PLR, Platelet-to-lymphocyte ratio; MLR, Monocyte-to-lymphocyte ratio; PNI, Prognostic nutritional index; SIRI, Systemic inflammatory response index; SII, Systemic immune-inflammation index; PIV, Pan-immune-inflammation value; MPR, Mean platelet volume to platelet ratio; HRR, Hemoglobin-to-red blood cell distribution width ratio; CAR, C-reactive protein to albumin ratio.


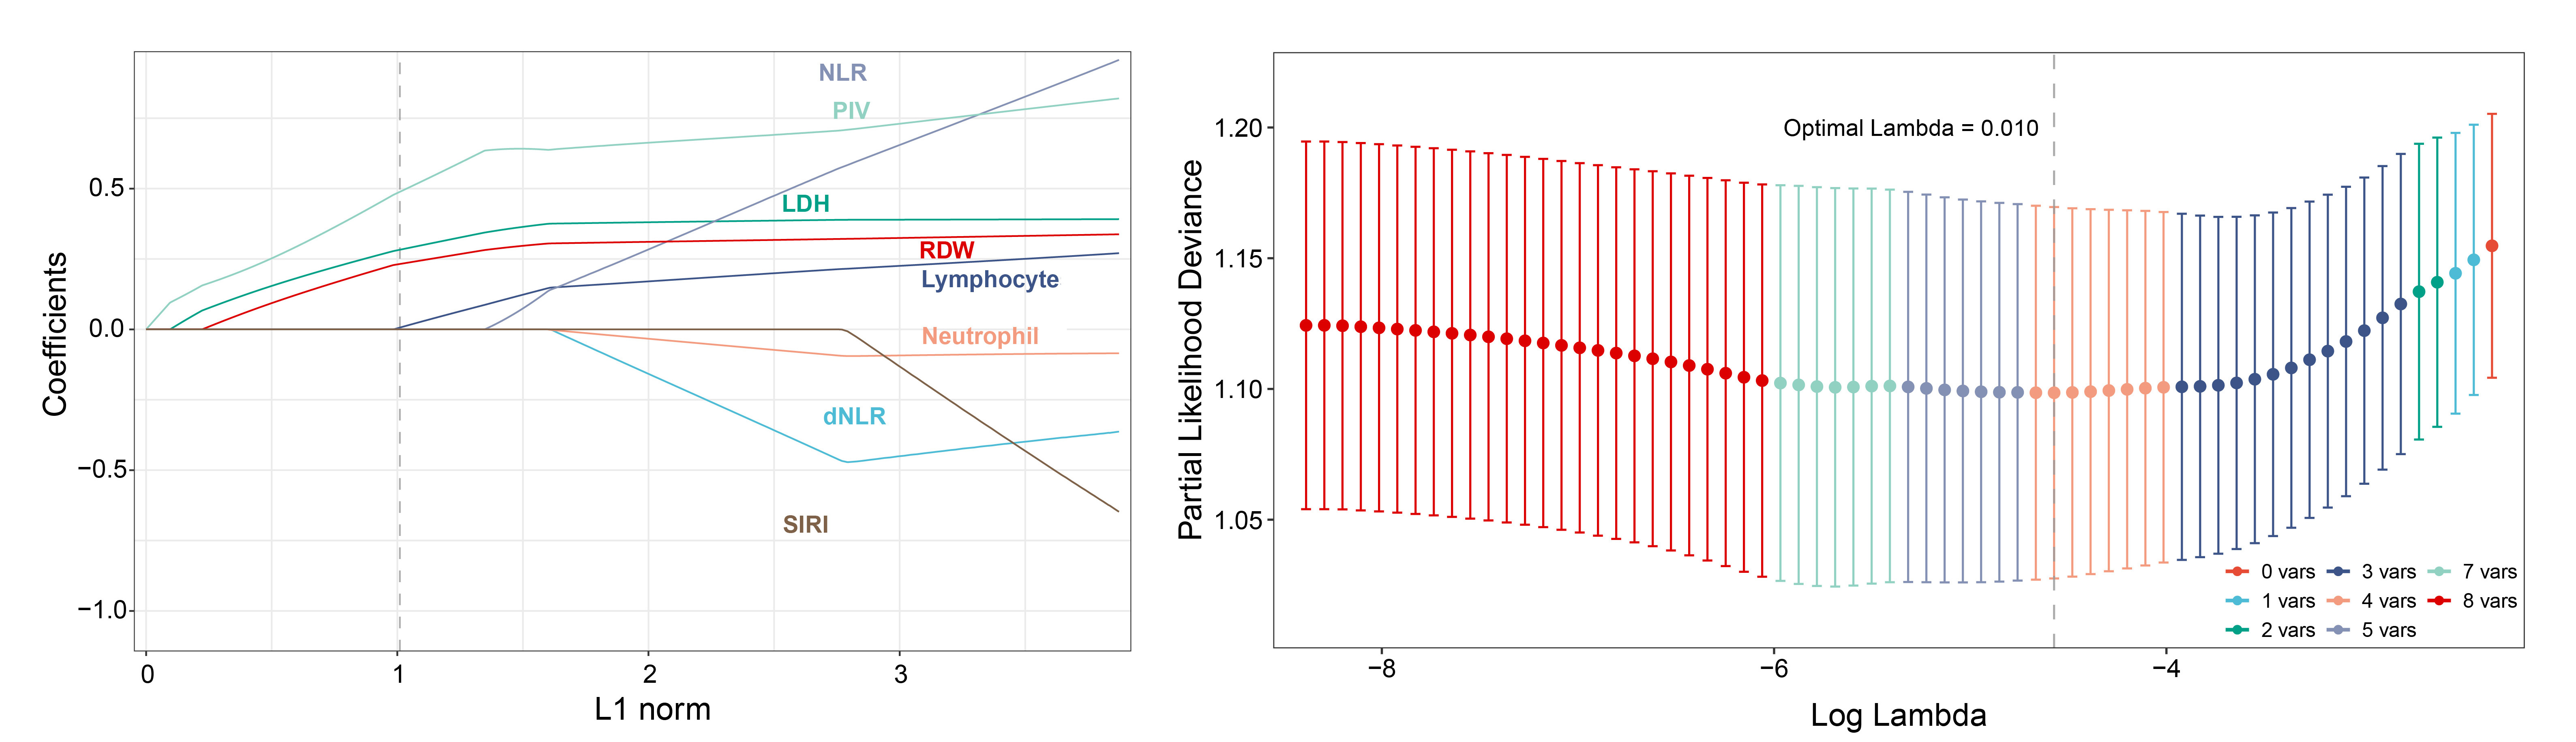


**Figure S4.** Feature selection using the least absolute shrinkage and selection operator (LASSO) regression model.

**Abbreviations:** RDW, Red blood cell distribution width; LDH, Lactate dehydrogenase; NLR, Neutrophil-to-lymphocyte ratio; dNLR, Derived neutrophil-to-lymphocyte ratio; SIRI, Systemic inflammatory response index; PIV, Pan-immune-inflammation value.


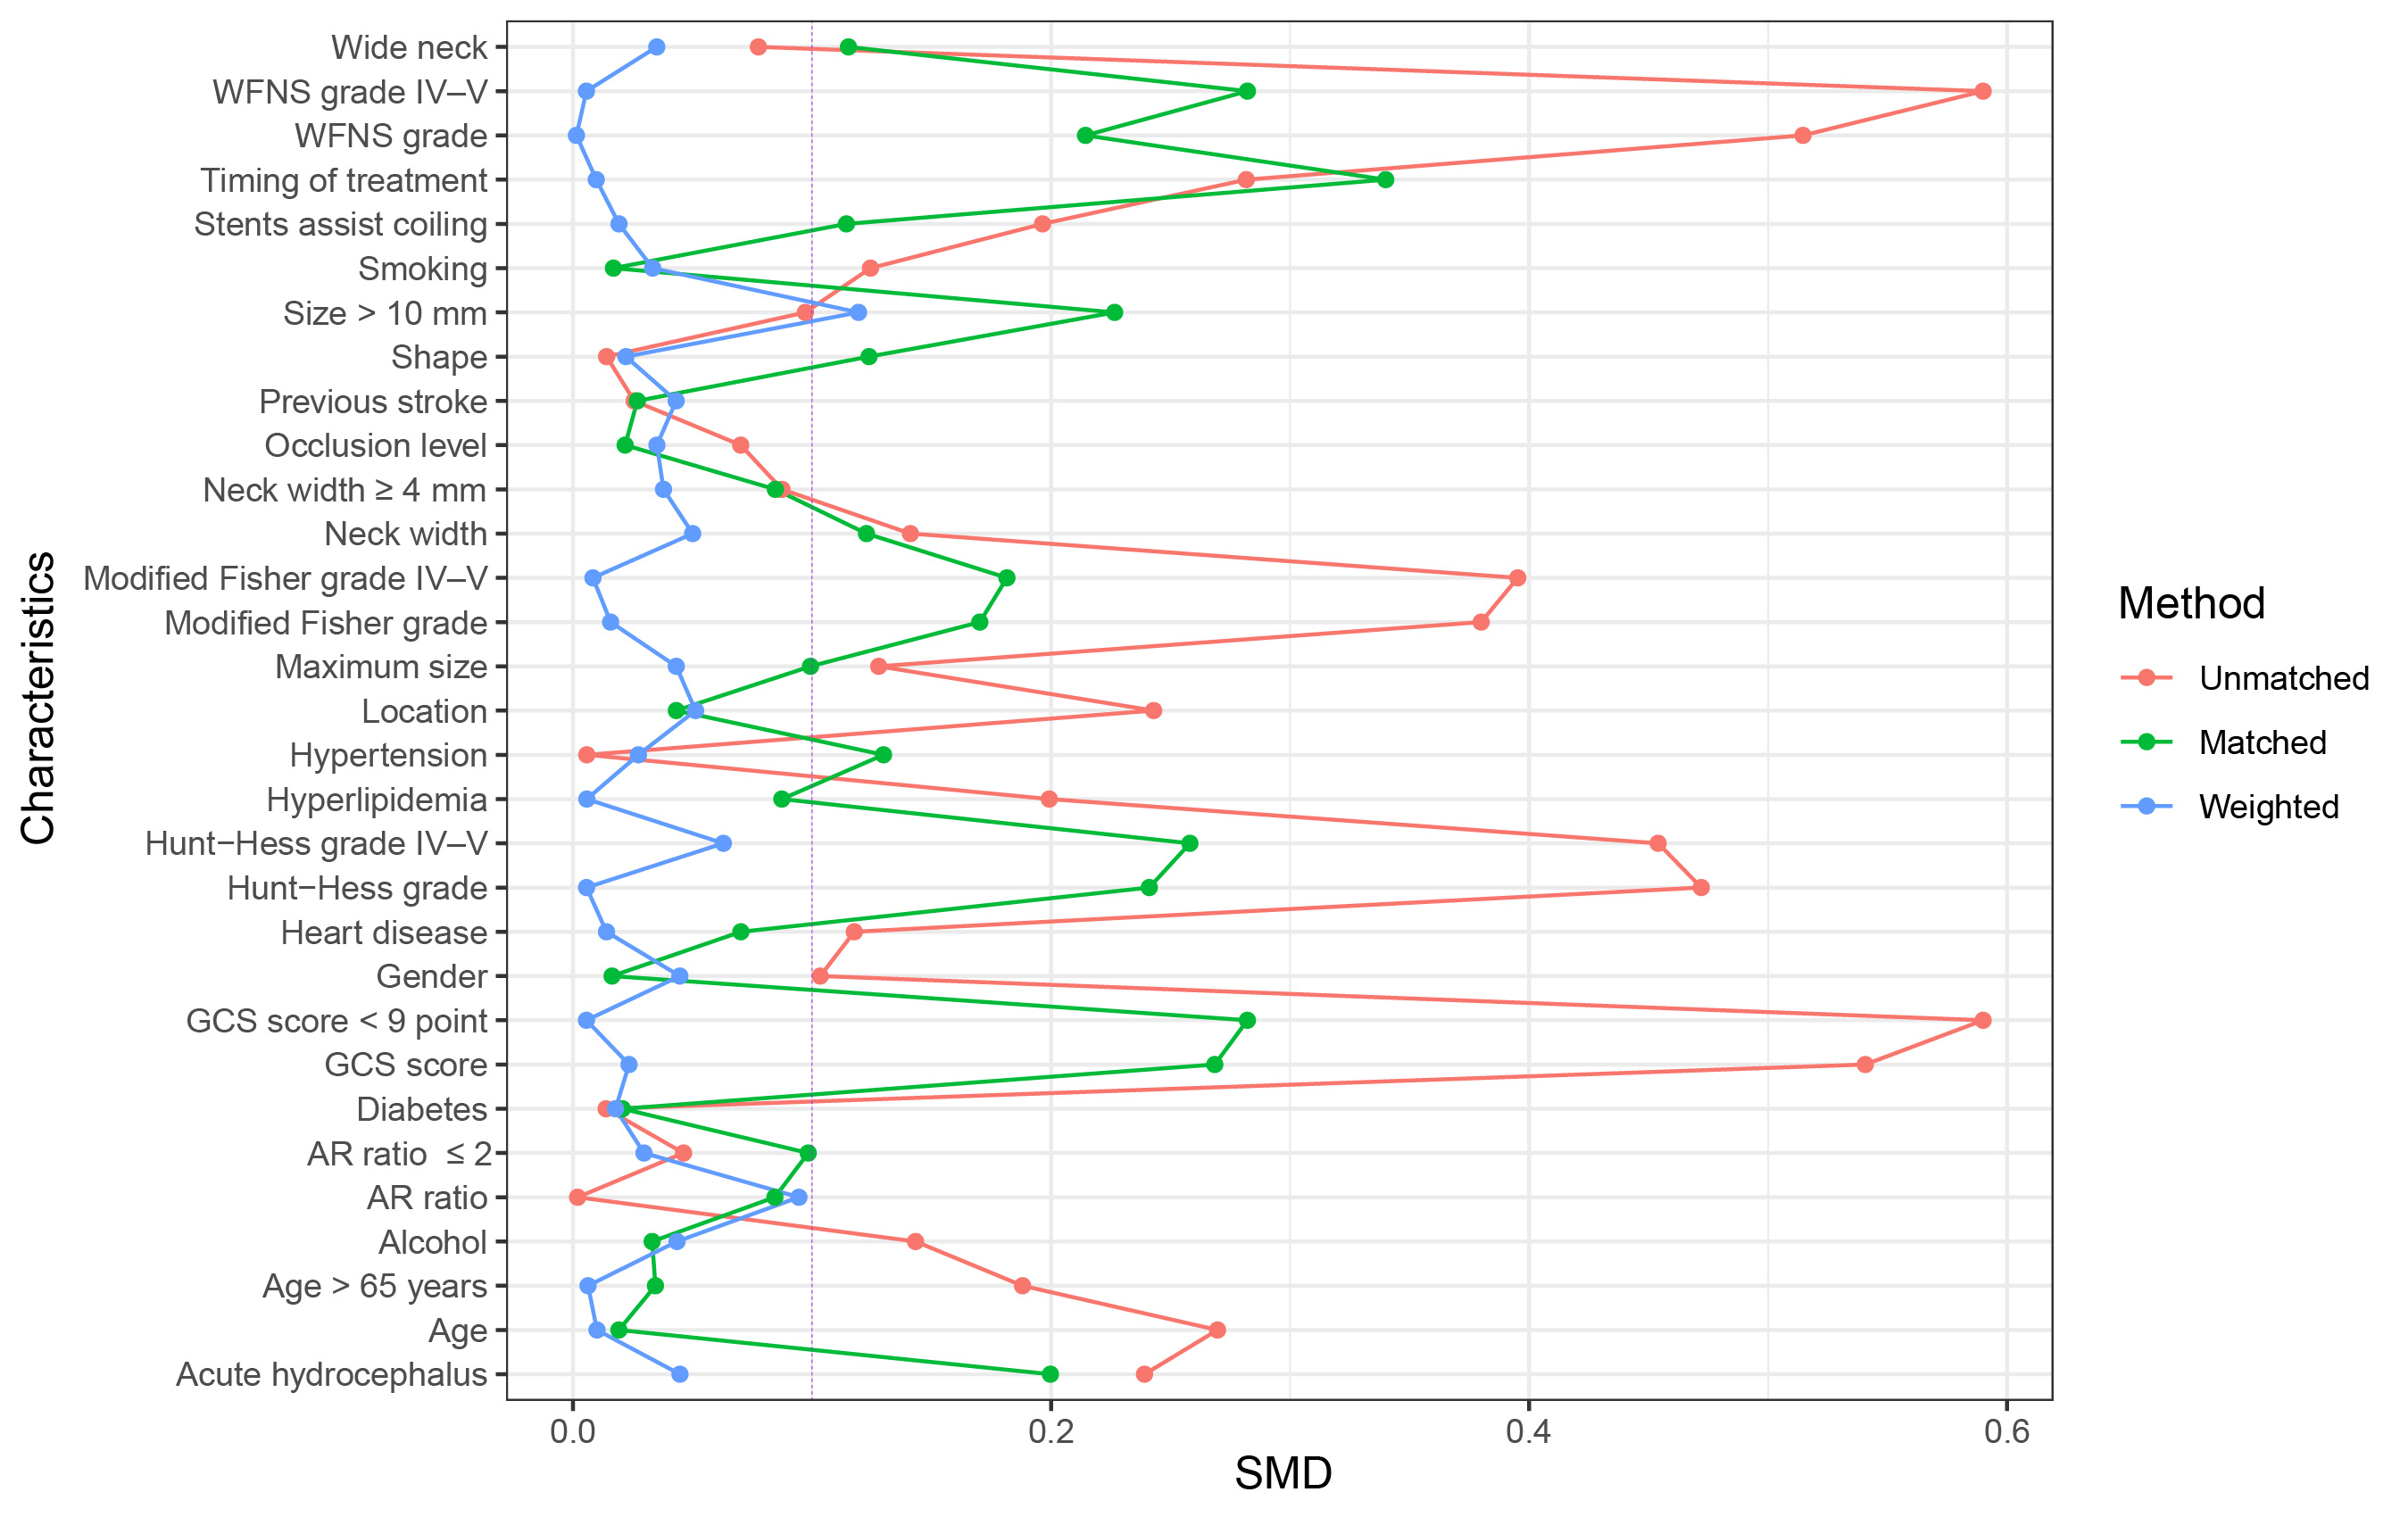


**Figure S5.** The standard mean differences of baseline characteristics before matching and after matching.

**Abbreviations:** GCS, Glasgow Coma Scale; WFNS, World Federation of Neurosurgical Societies; HH, Hunt Hess; mFS, modified Fisher Scale; AR, aneurysm maximum height to neck diameter ratio; DCI, delayed cerebral ischemia.


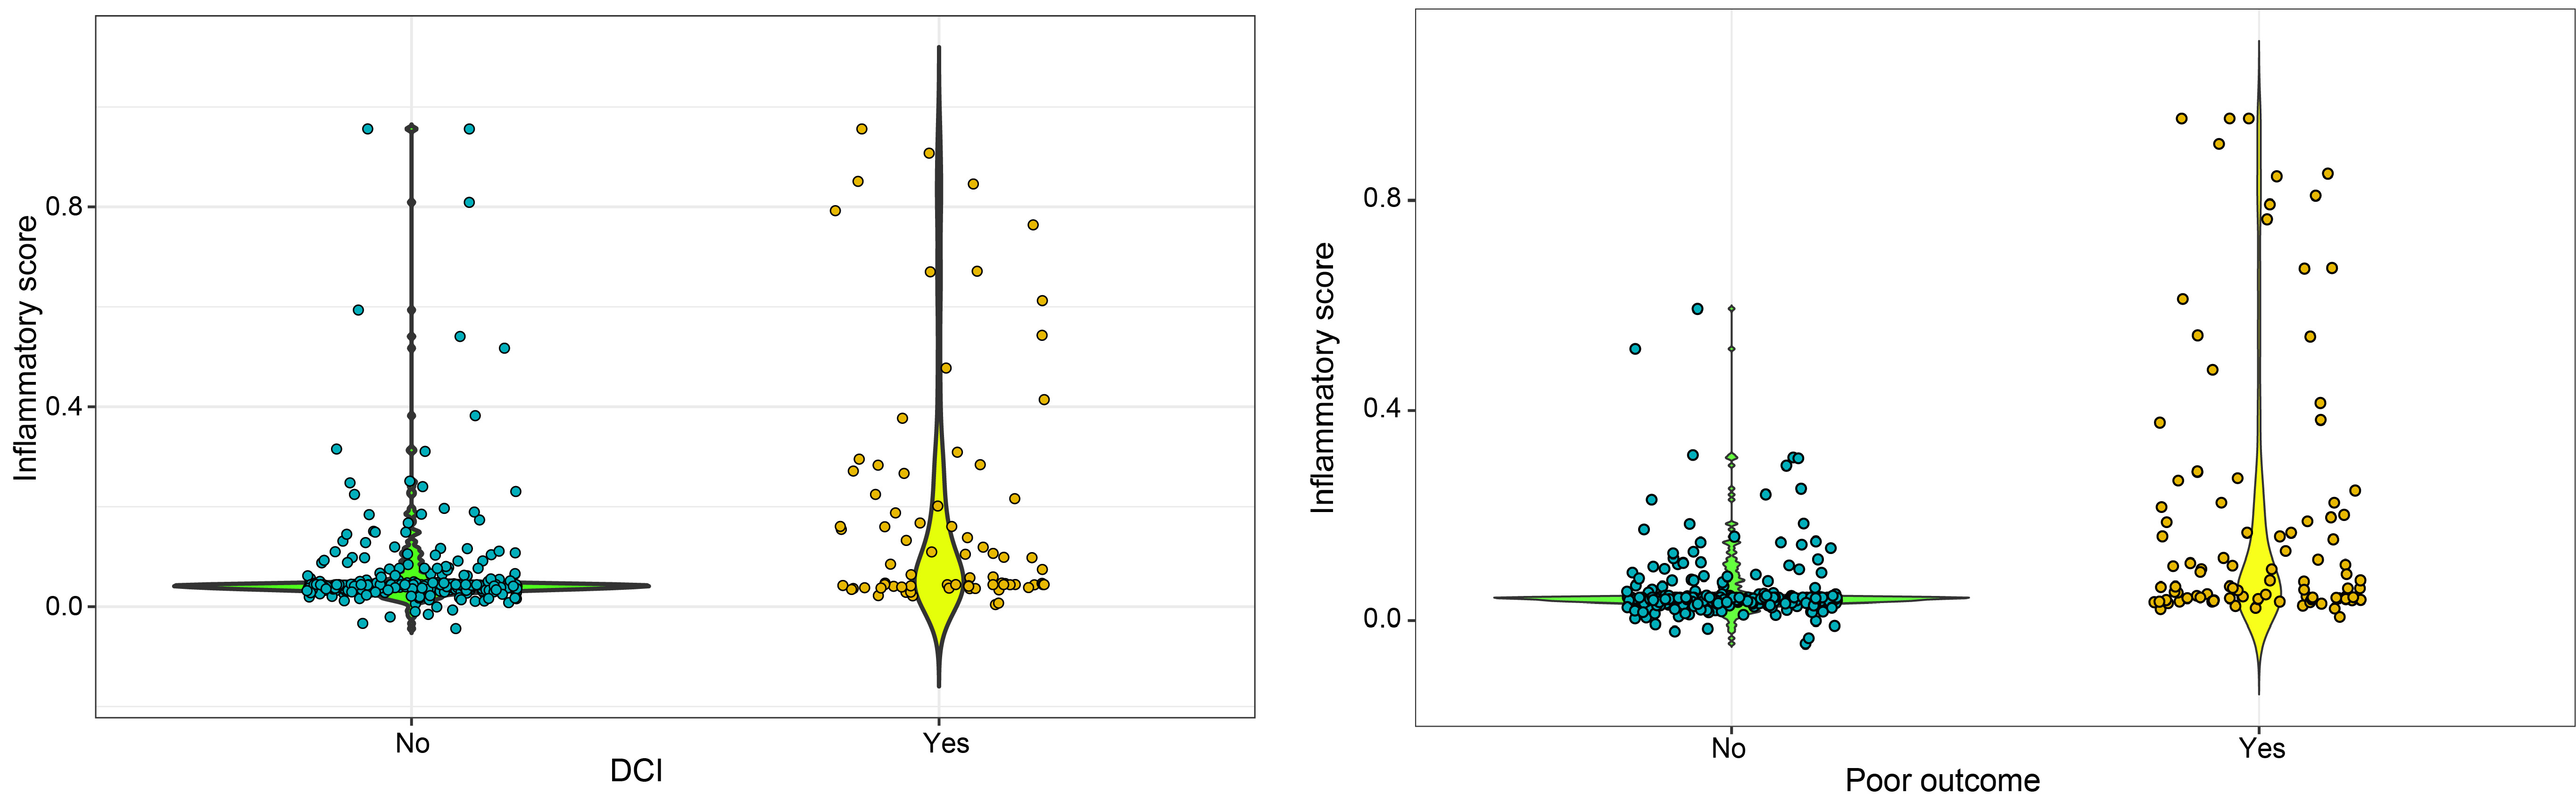


**Figure S6.** Boxplot of inflammatory score between aSAH patients with and without DCI, and poor outcome.

**Abbreviations:** DCI, delayed cerebral ischemia; aSAH: aneurysmal subarachnoid hemorrhage.


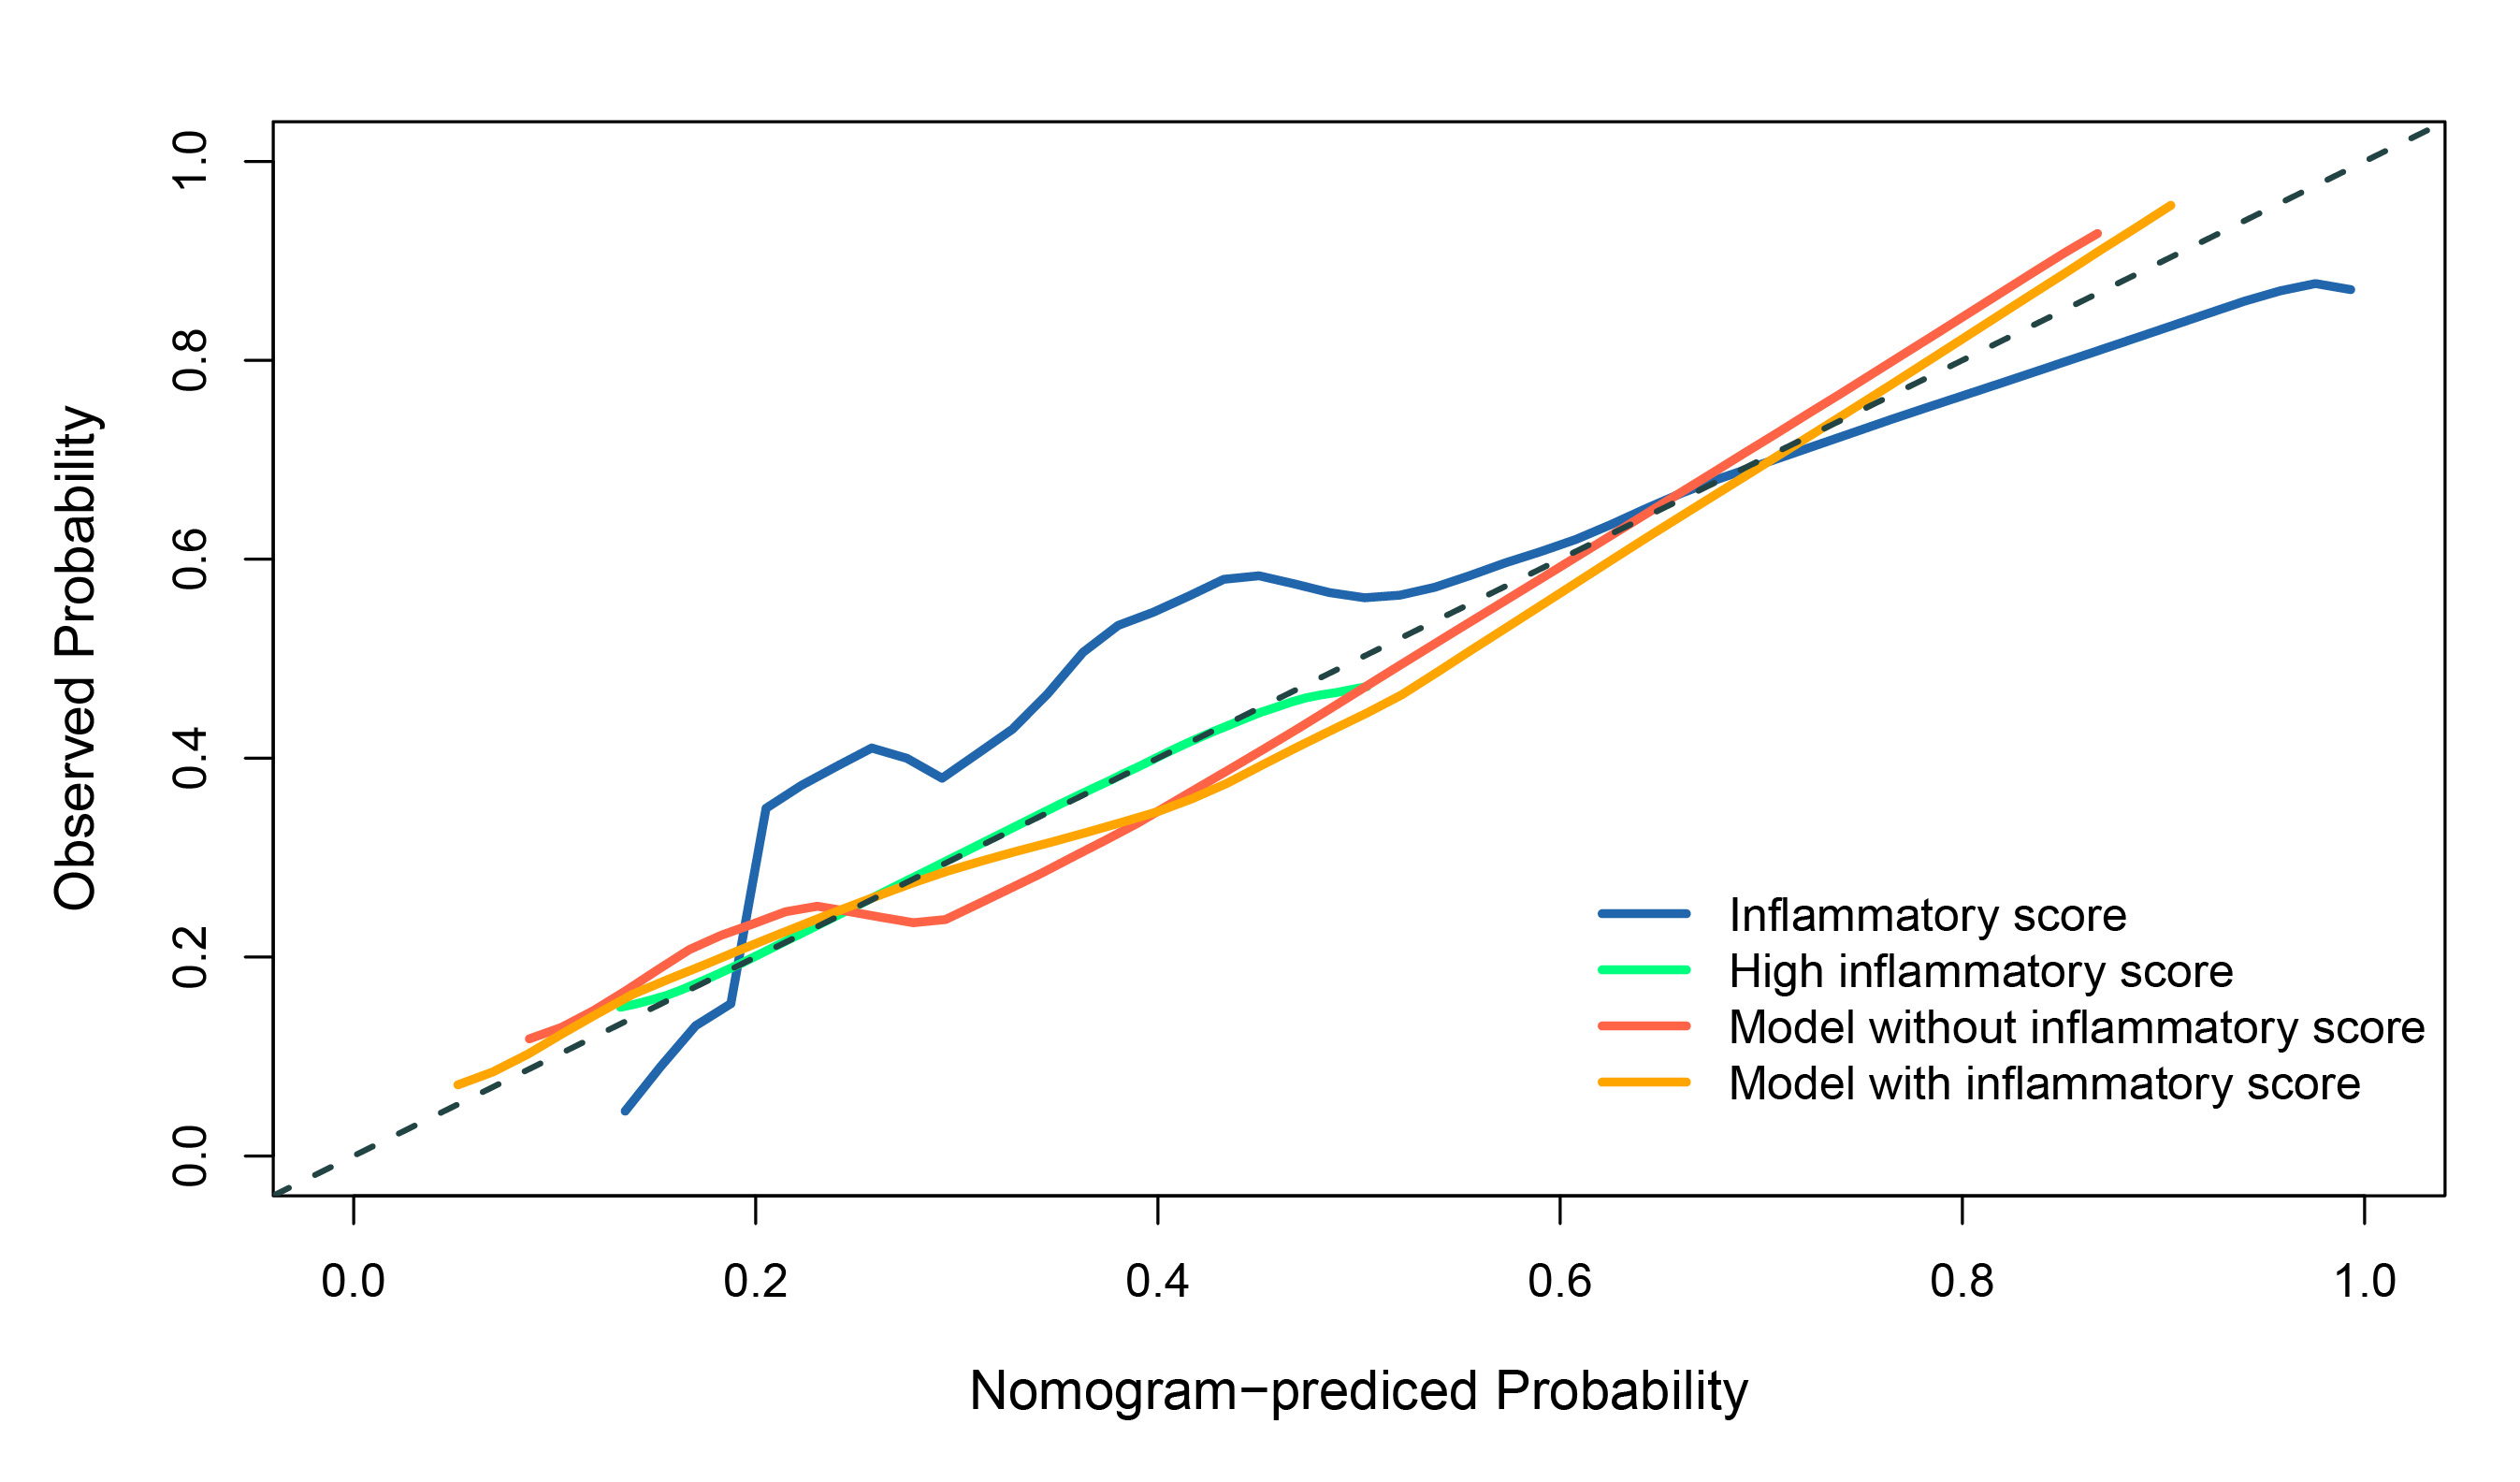
 **Figure S7.** Calibration curves analysis of the model with or without inflammatory score.


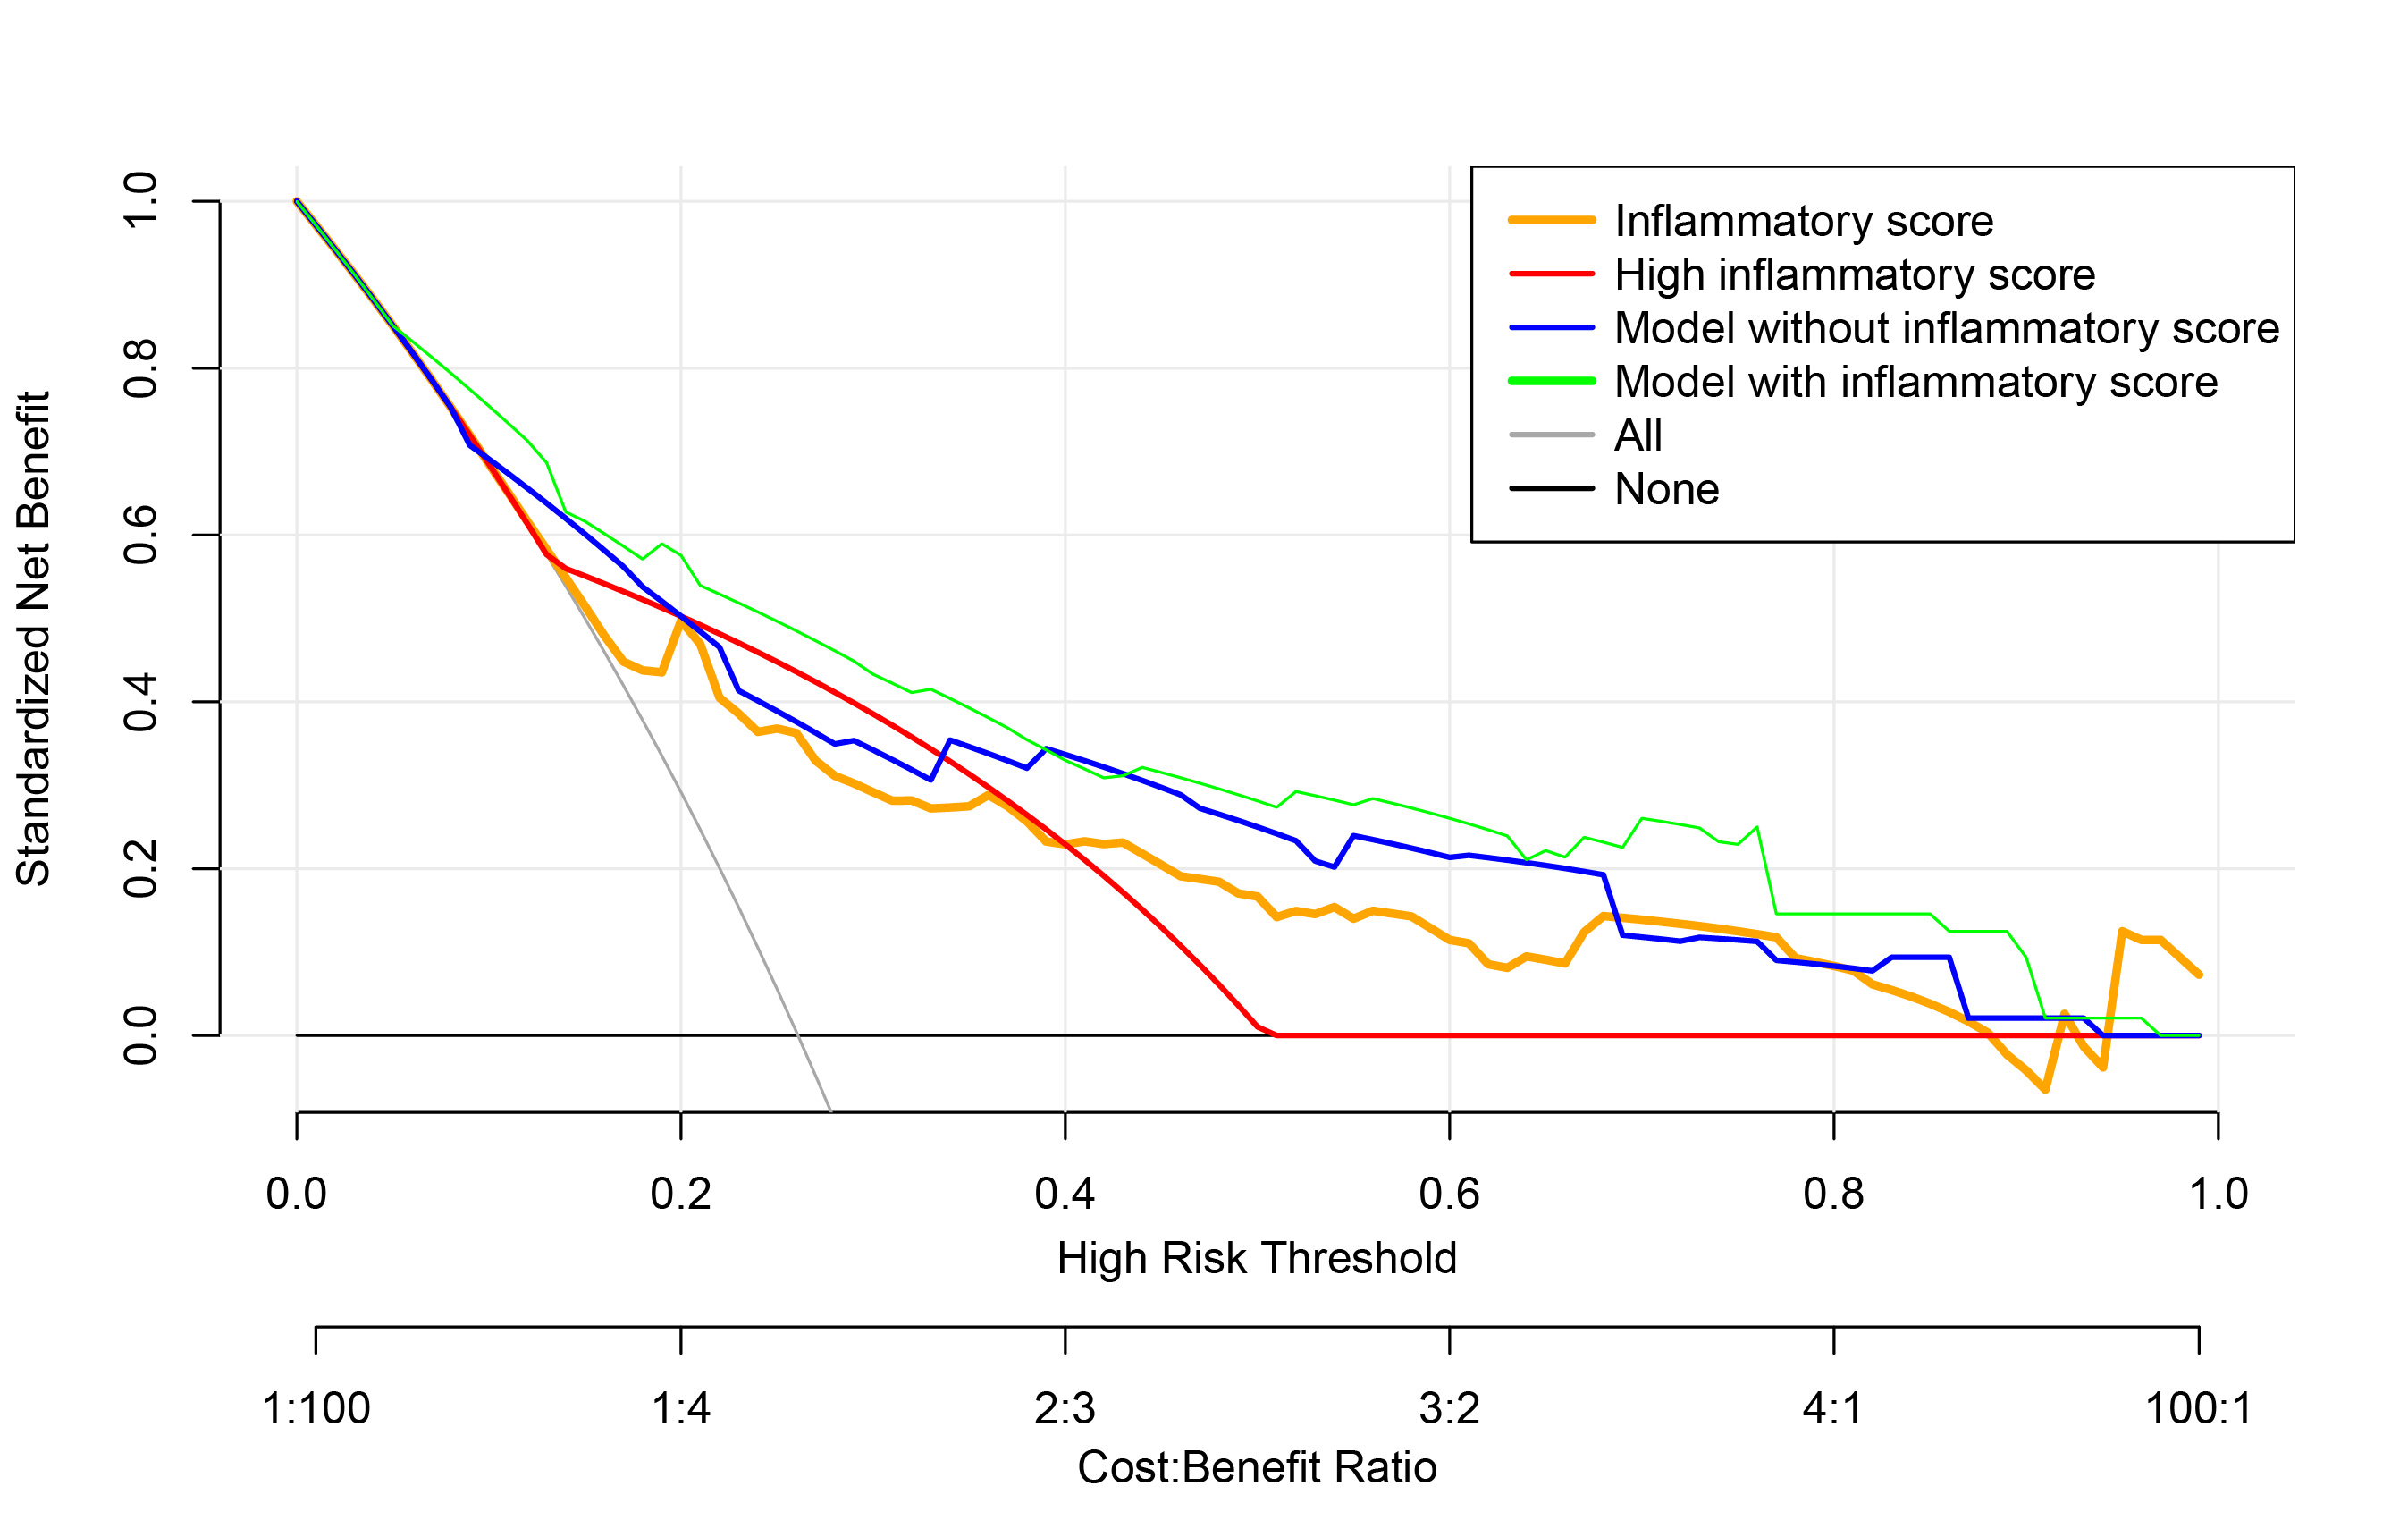
 **Figure S8.** Decision curve analysis of the model with or without inflammatory score.


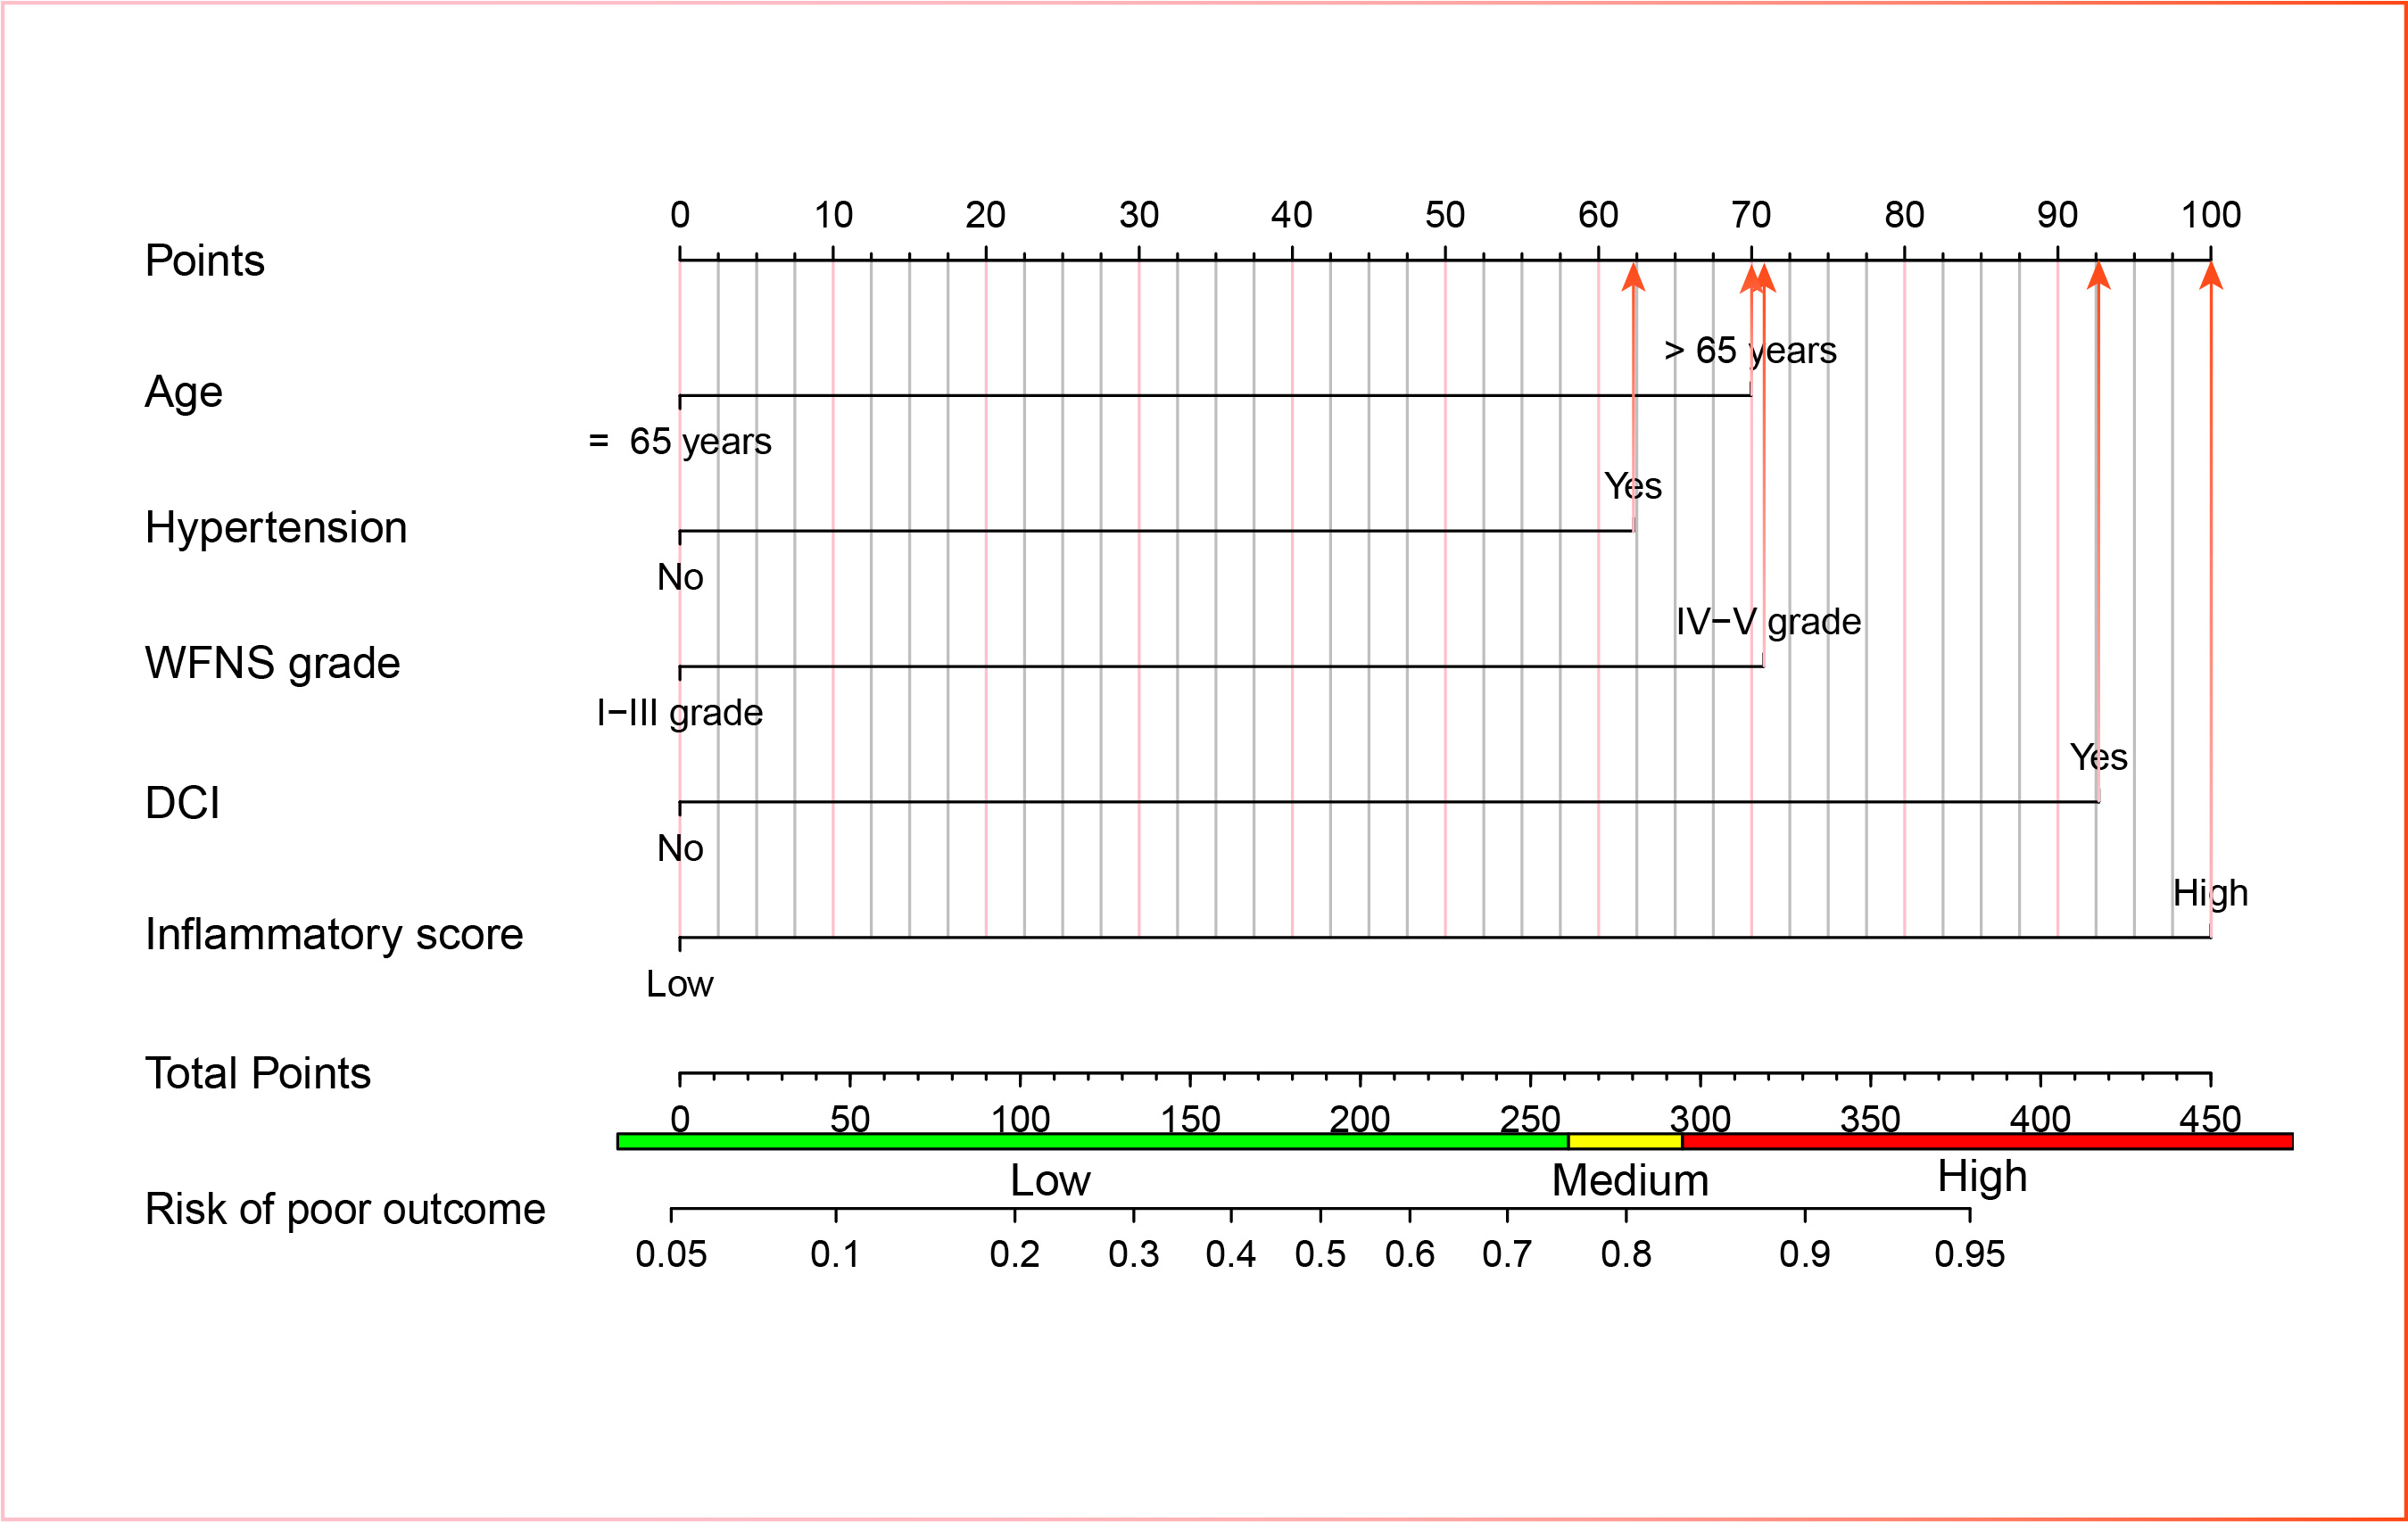


**Figure S9.** A nomogram based on inflammatory score for predicting poor outcome in aSAH patients.

**Abbreviations:** WFNS, World Federation of Neurosurgical Societies; DCI, delayed cerebral ischemia; aSAH: aneurysmal subarachnoid hemorrhage.


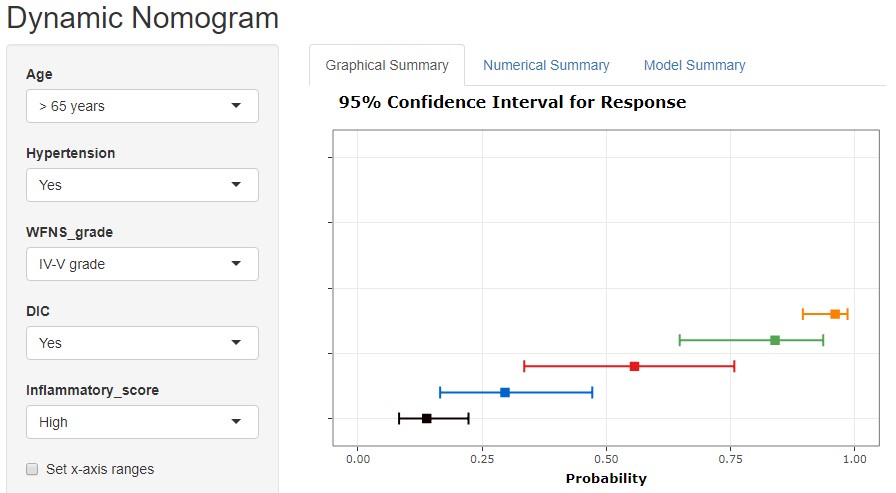


**Figure S10.** A web-based interactive calculator interface based on a nomogram for predicting the risk of poor outcome in aSAH patients (https://min115. shinyapps.io/dynnomapp/).

**Abbreviations:** WFNS, World Federation of Neurosurgical Societies; DCI, delayed cerebral ischemia; aSAH: aneurysmal subarachnoid hemorrhage.
